# Supplementary material
Source: PubMed Central journal article supplement (PMC5315527)

**EmVIG**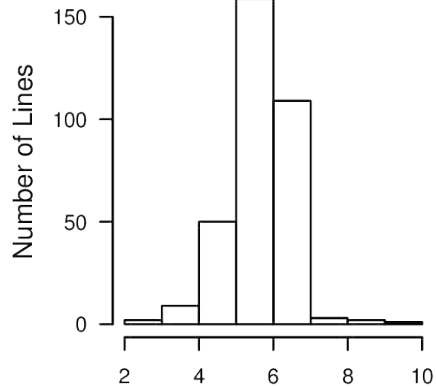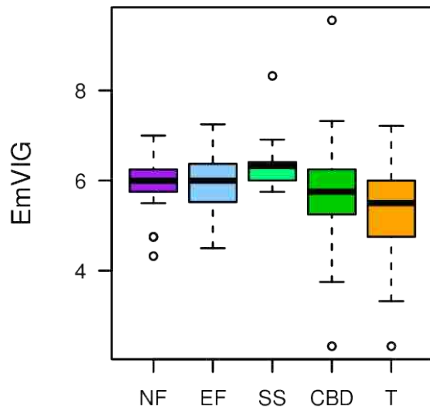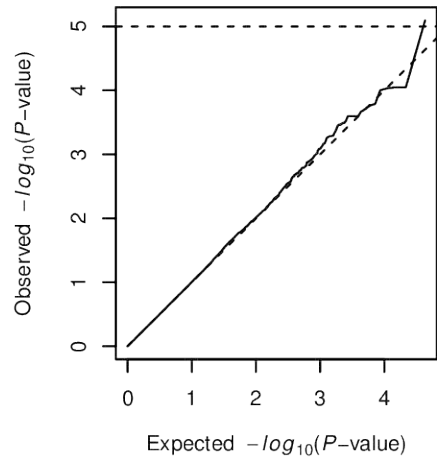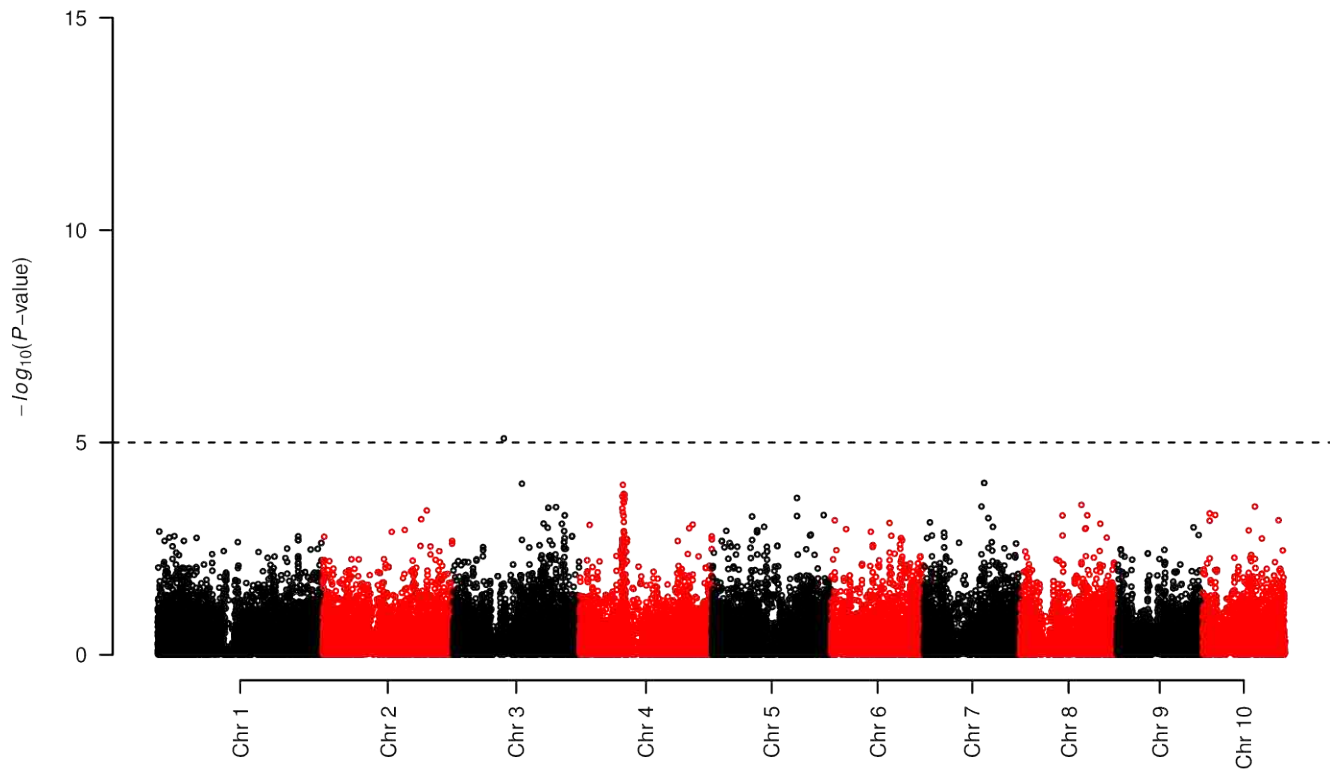

**Em8**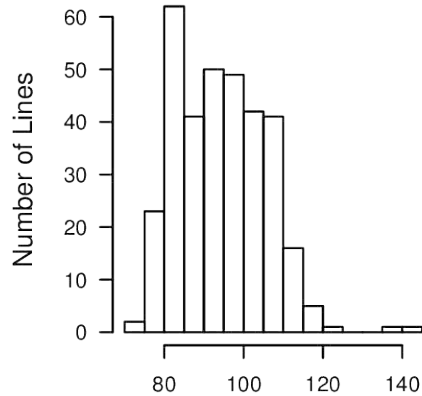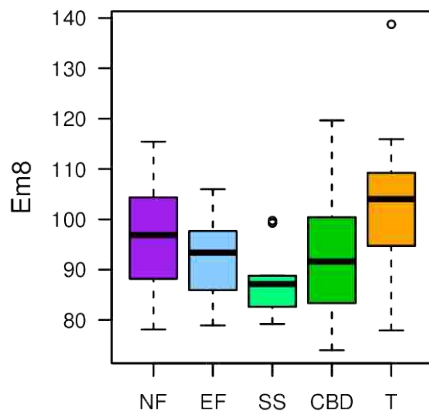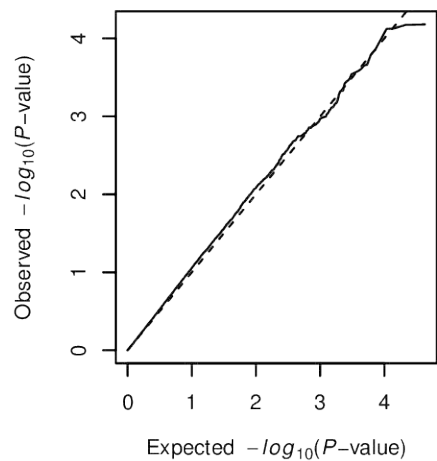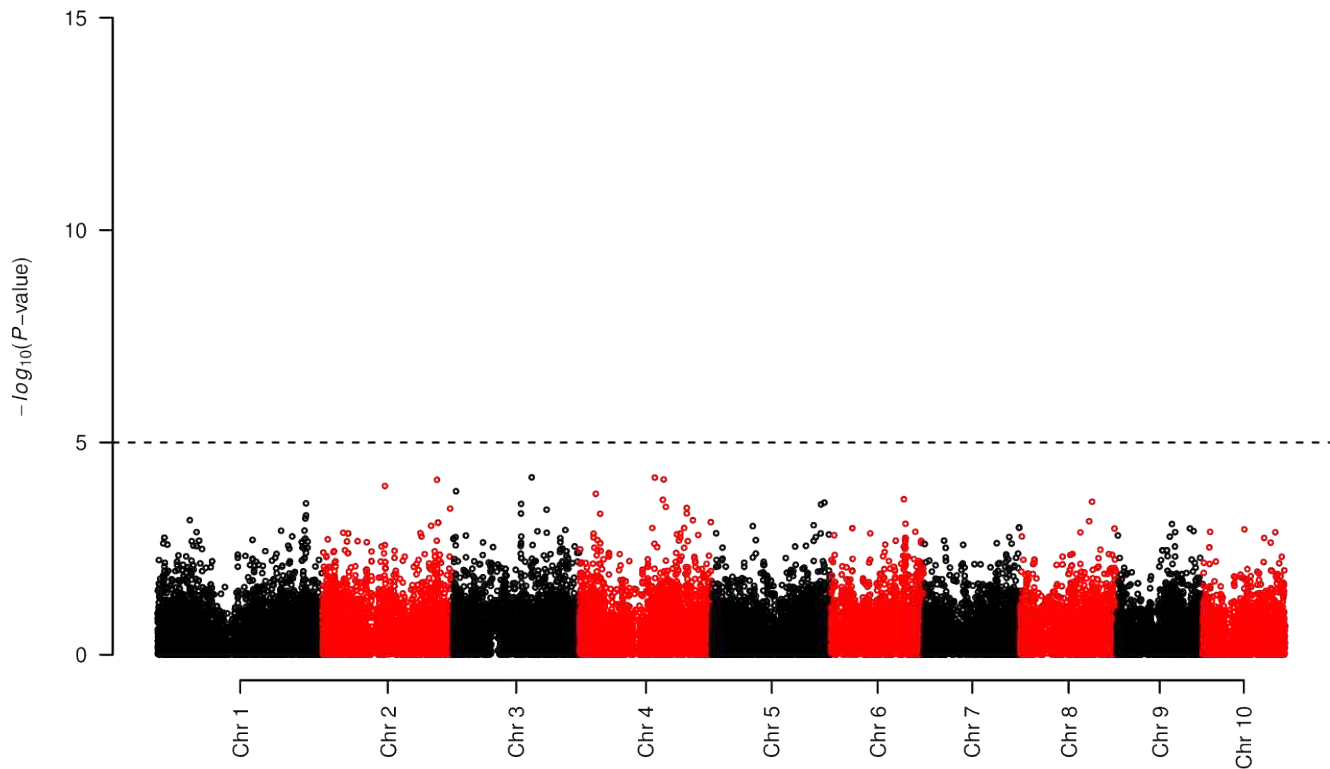

### S3LF8

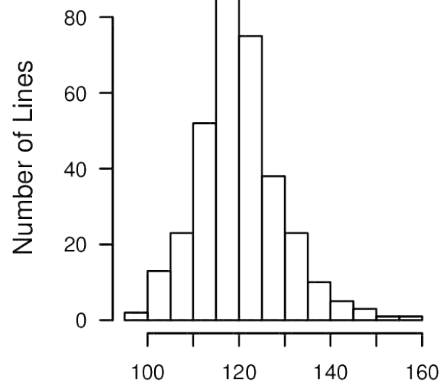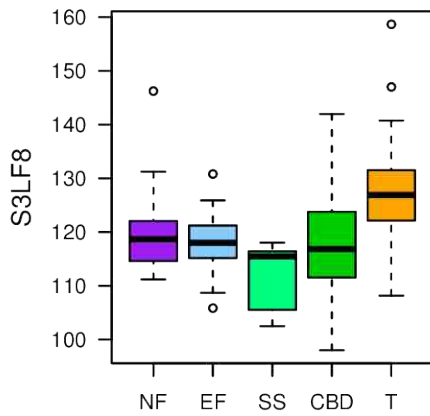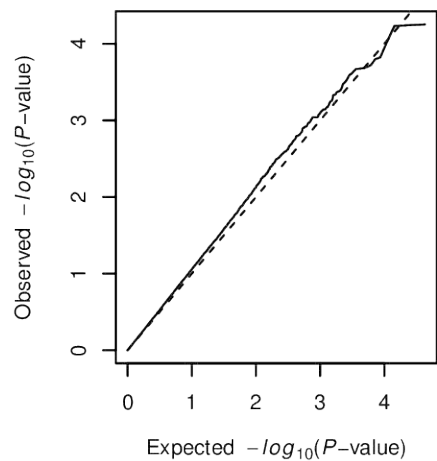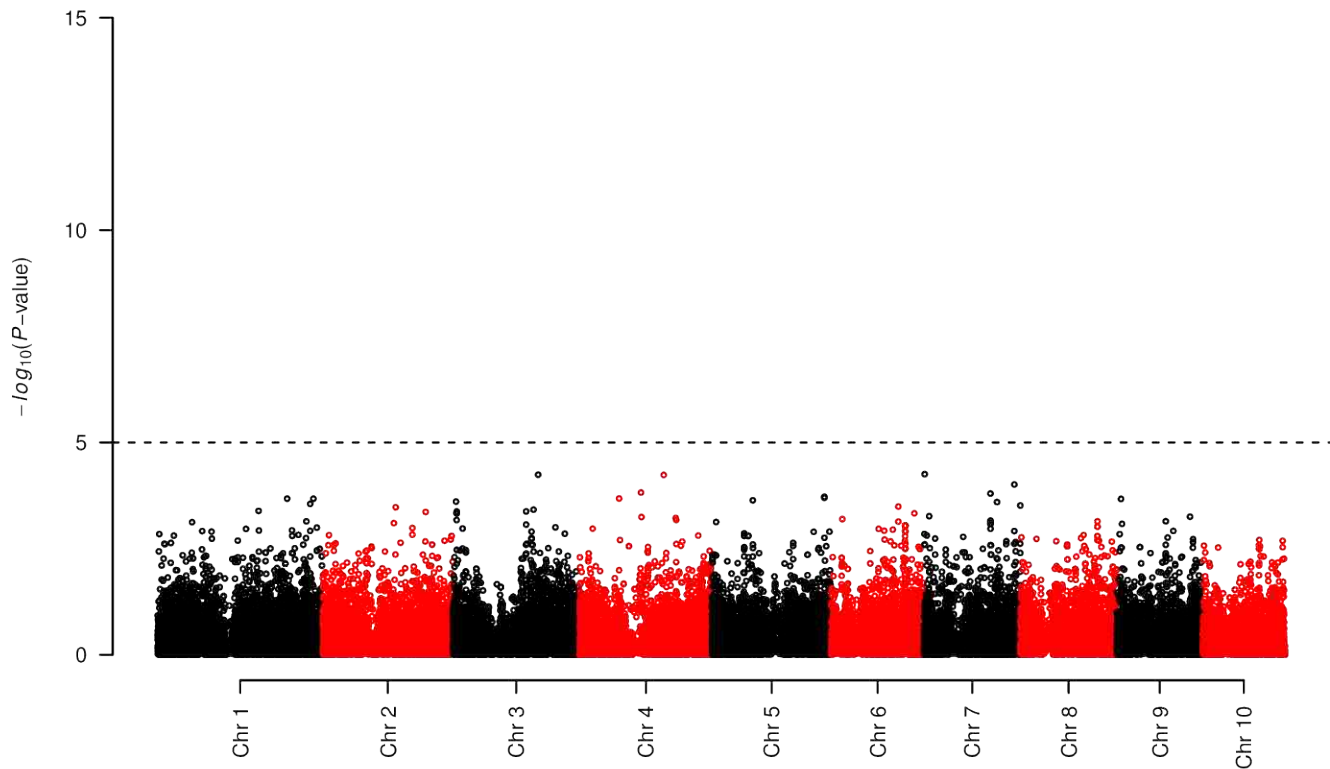

# MFLW8

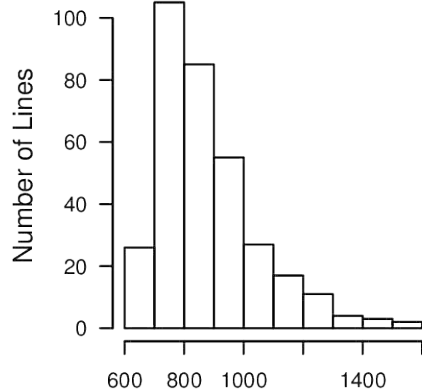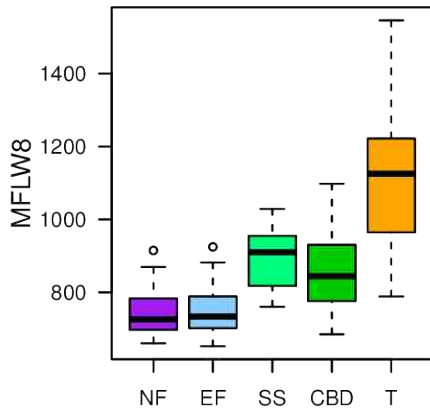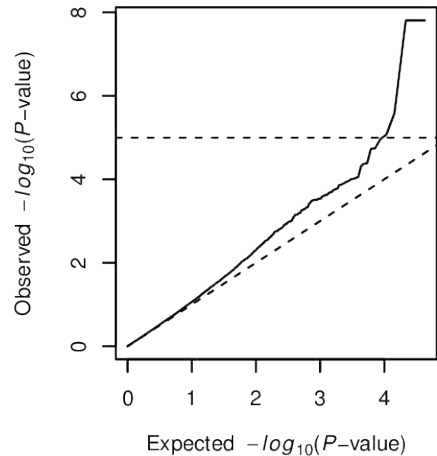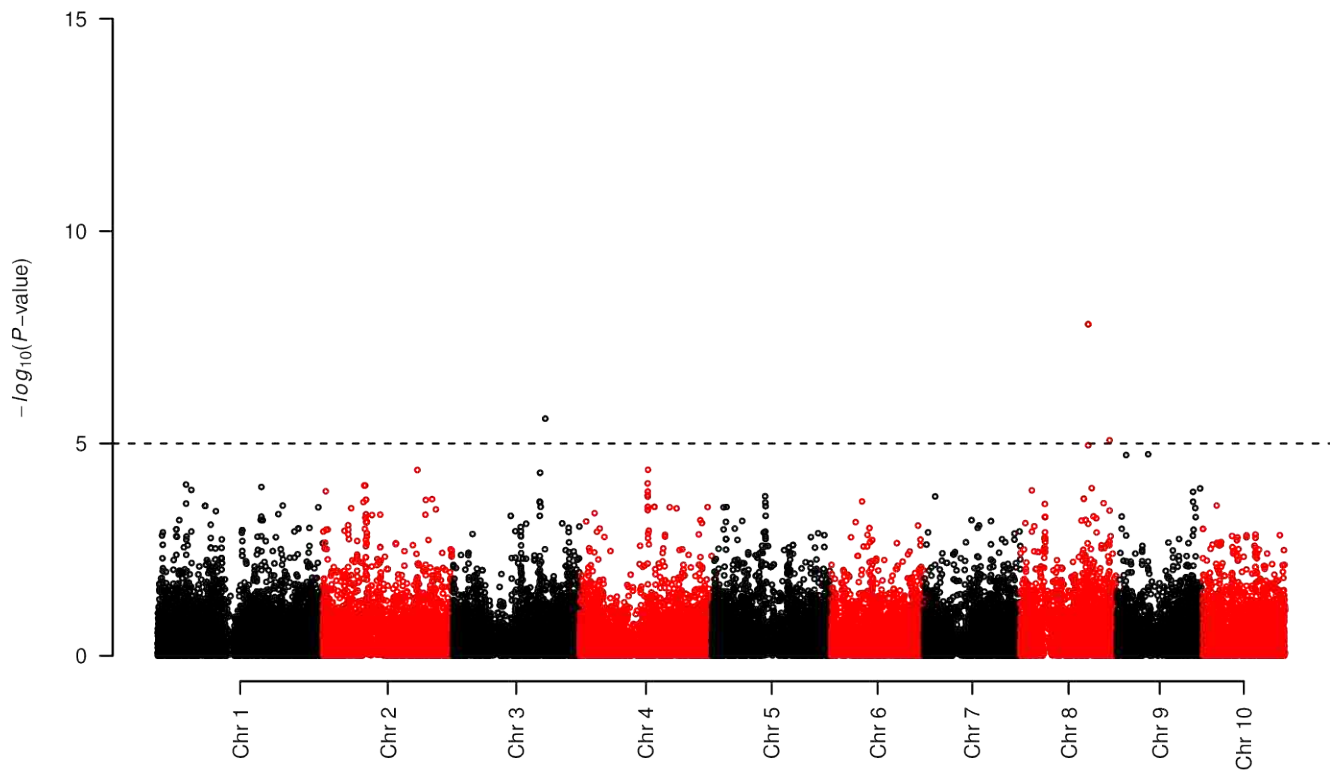

**FFLW8**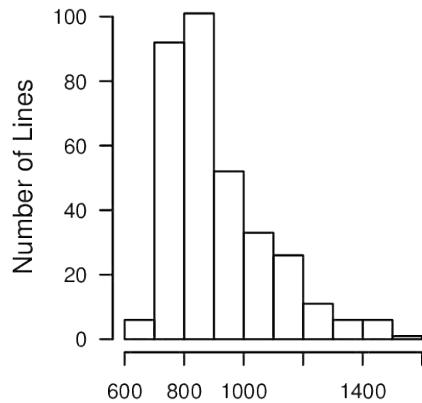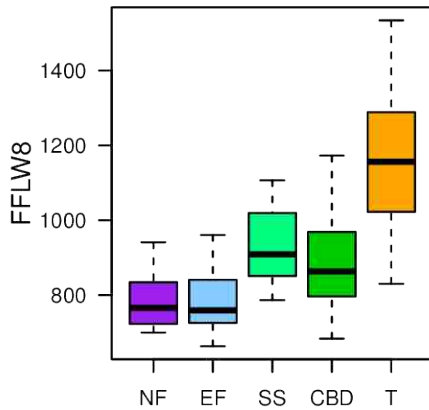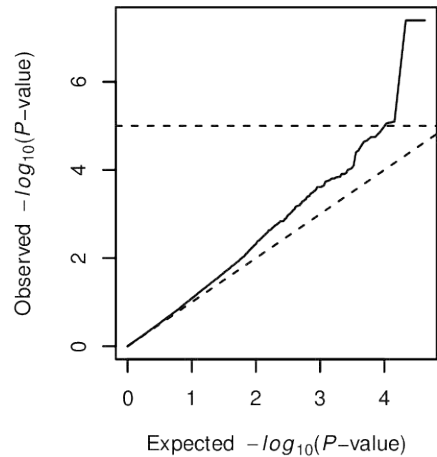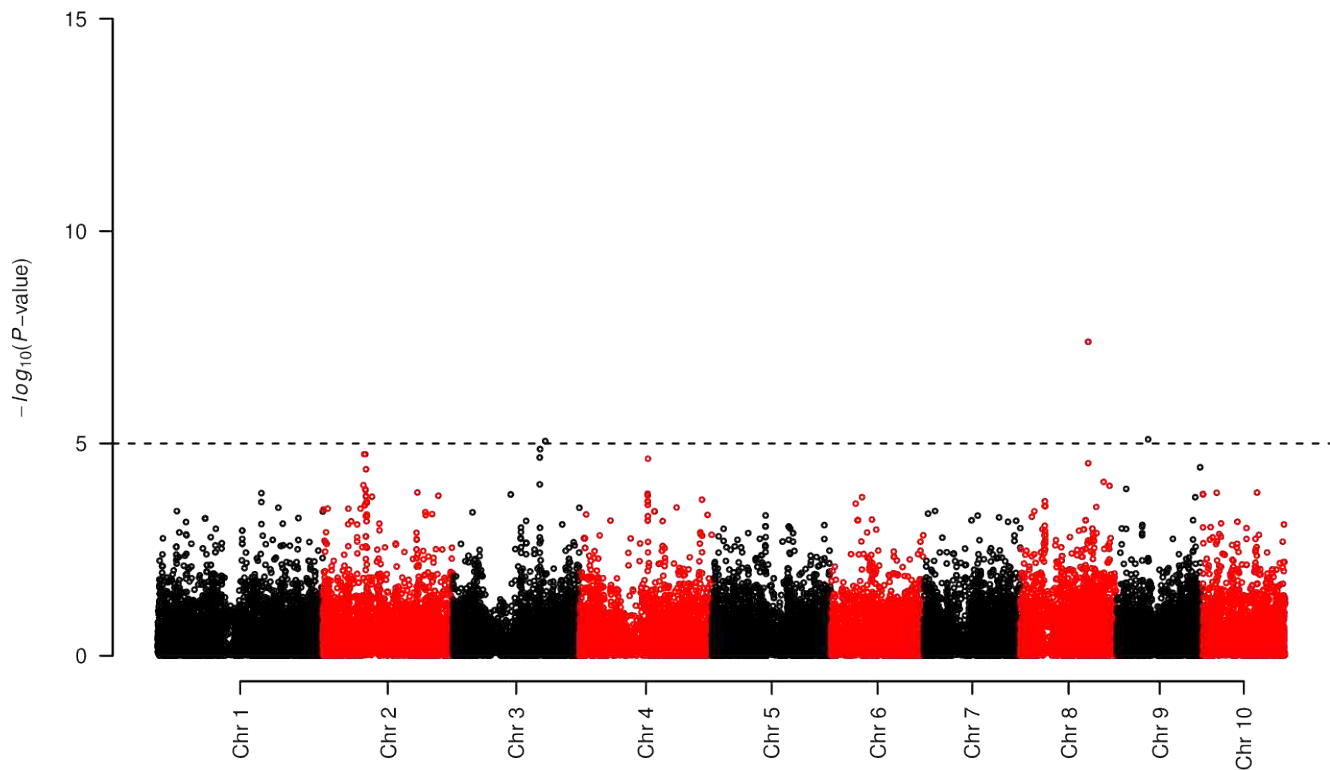

**ASI8**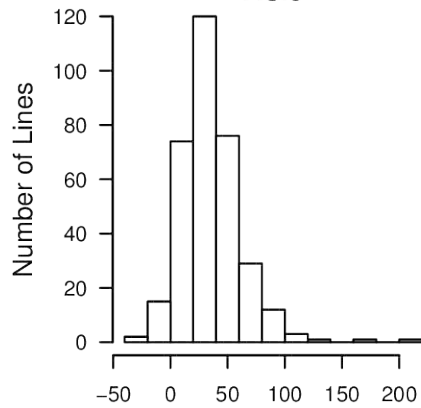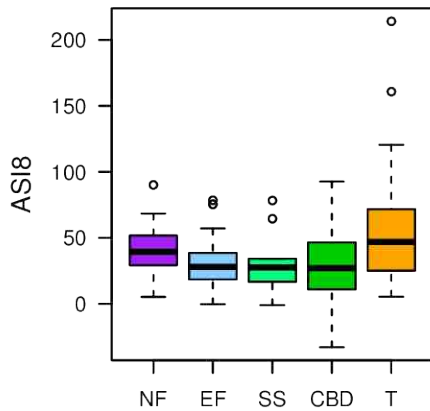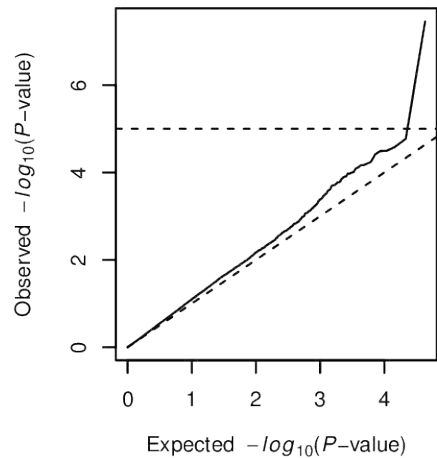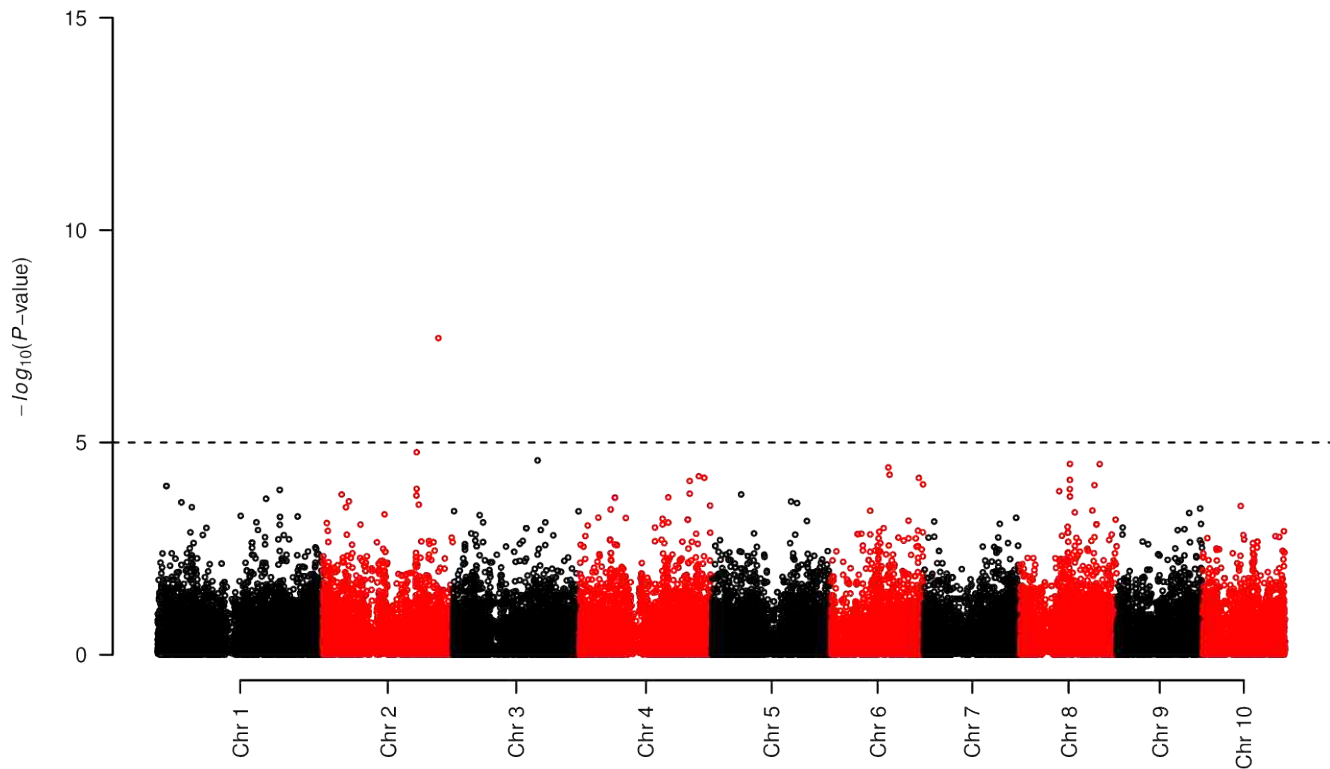

### PTHT

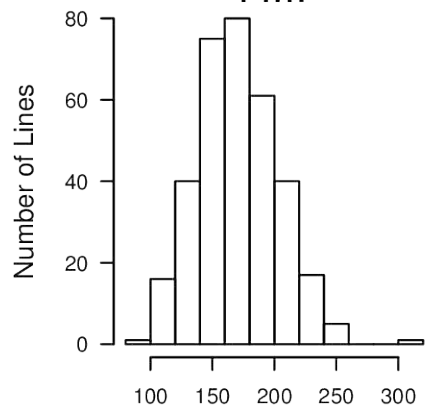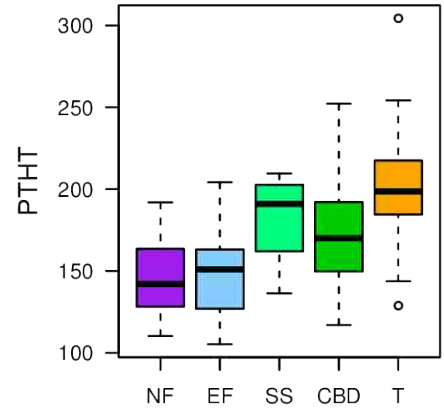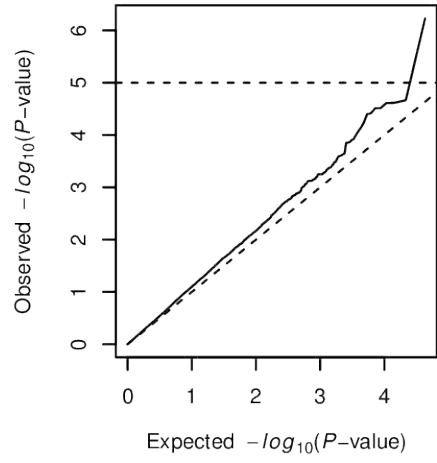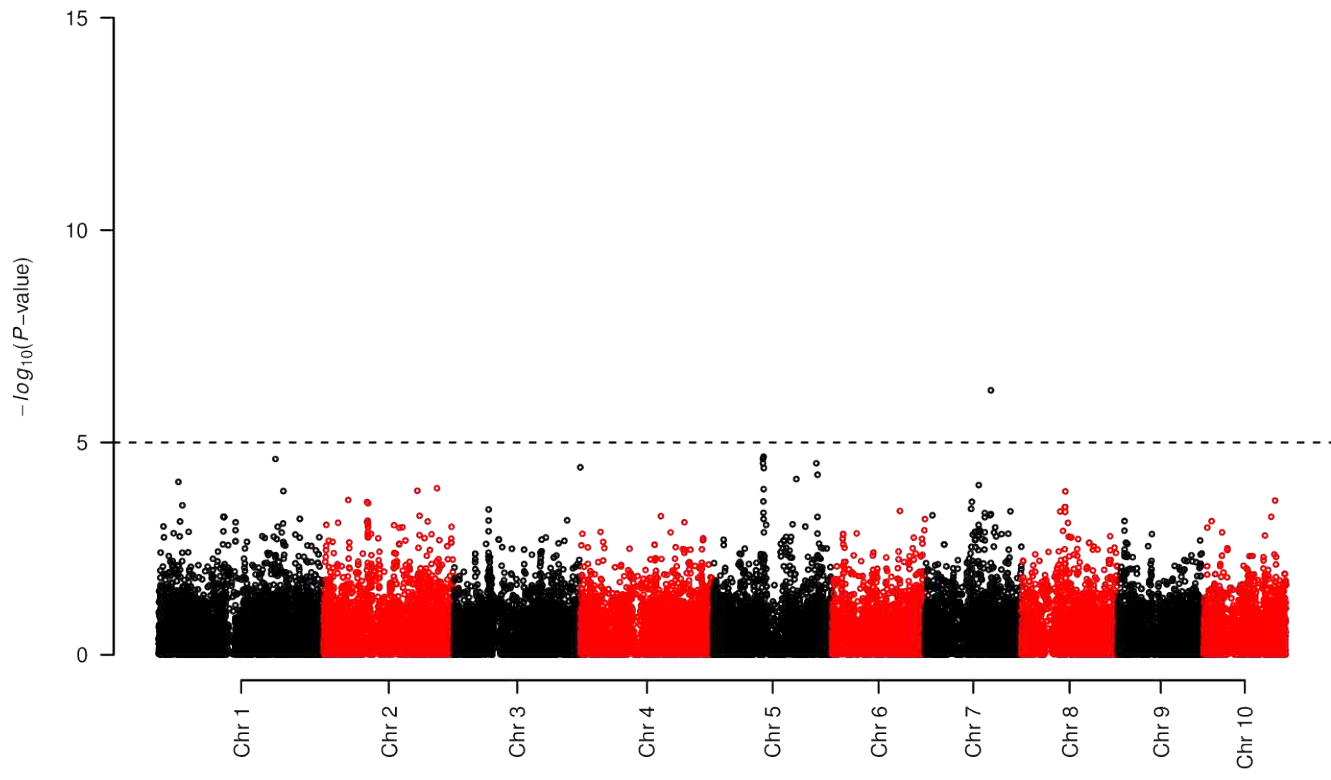

# EARHT

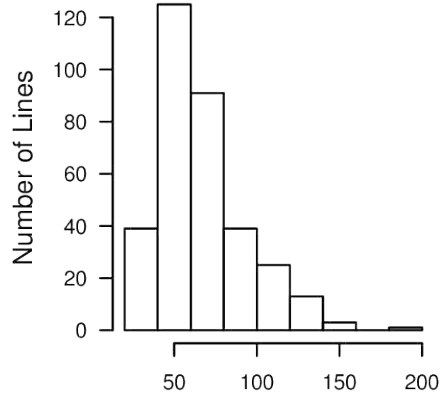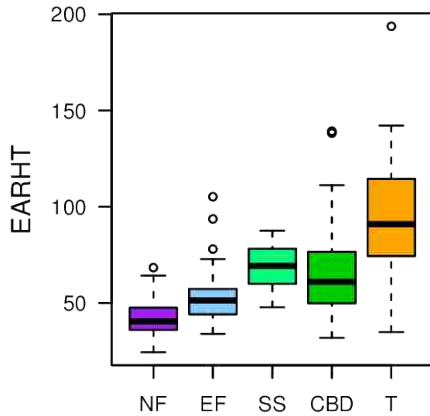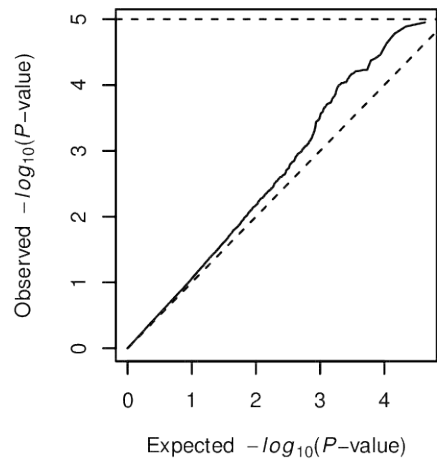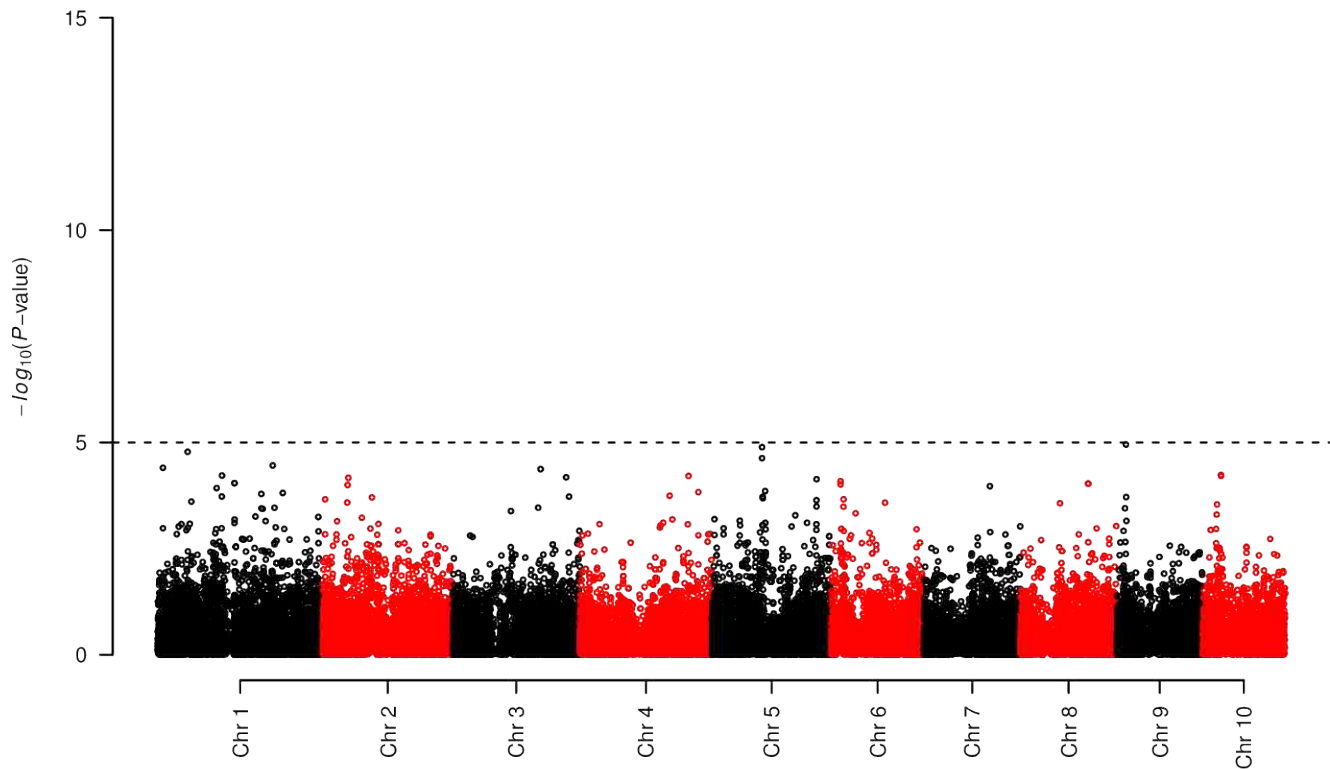



**LFNB**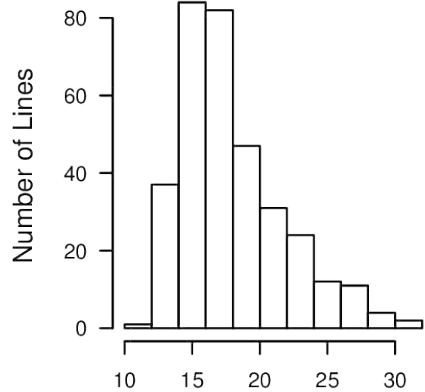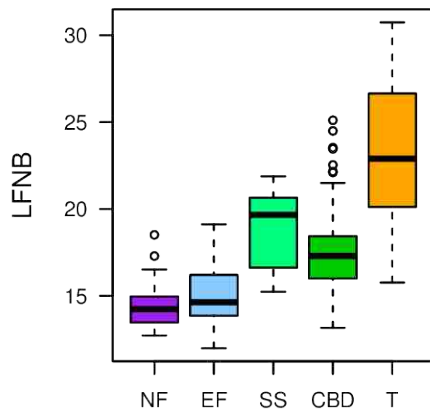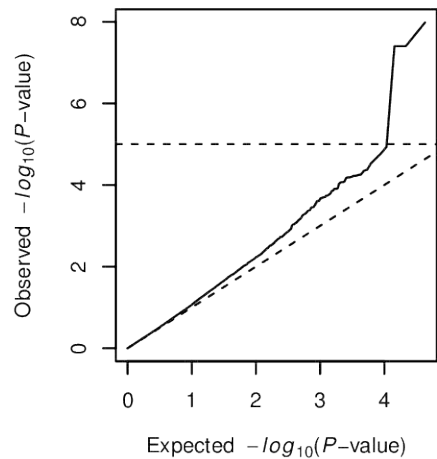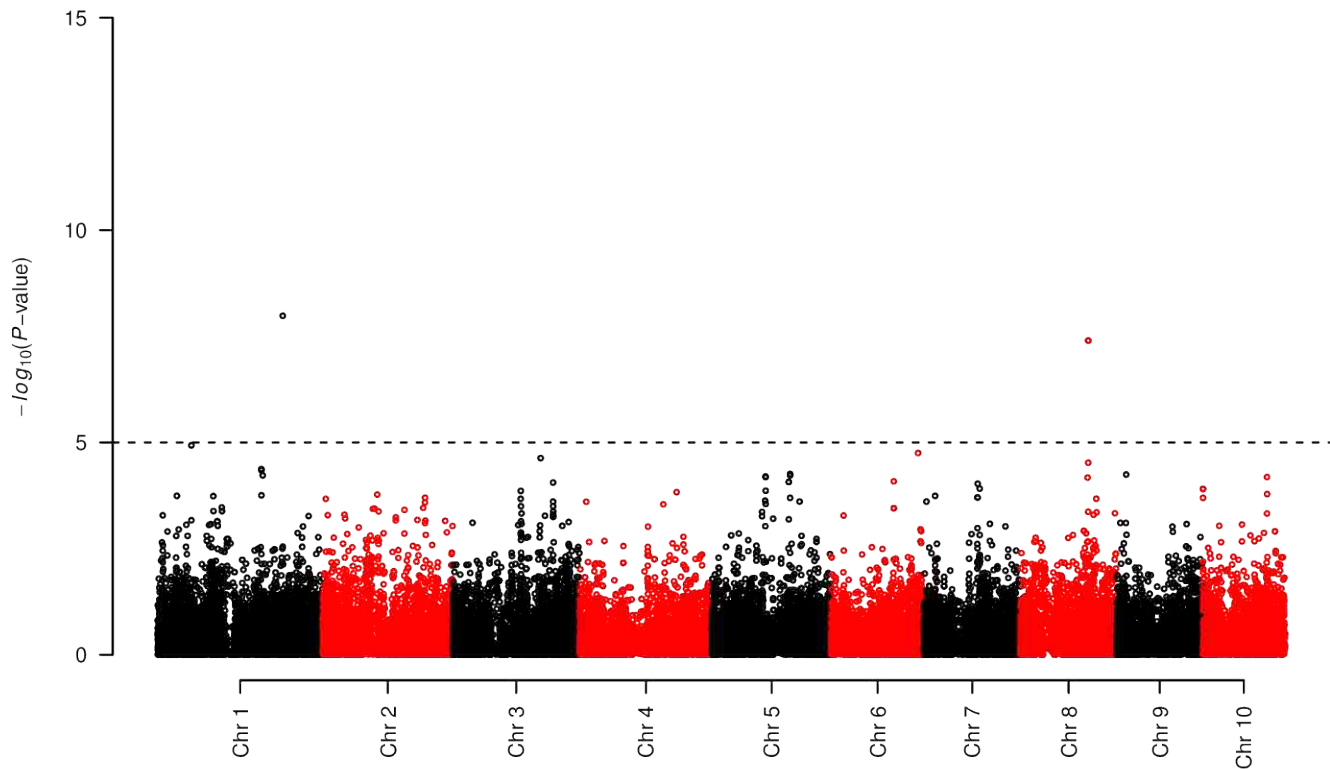

### LFNBa

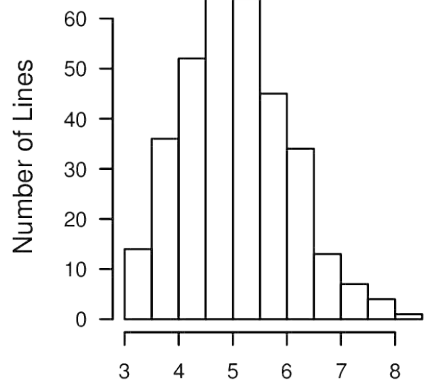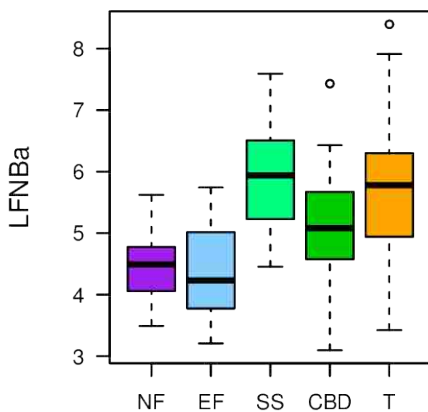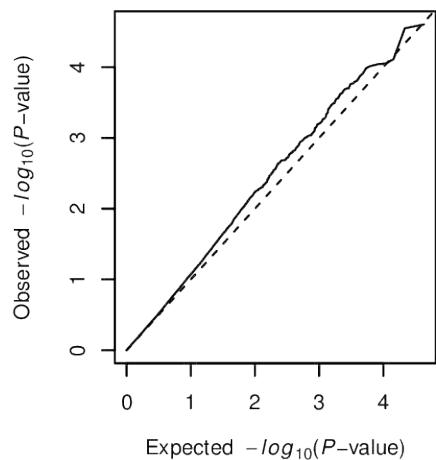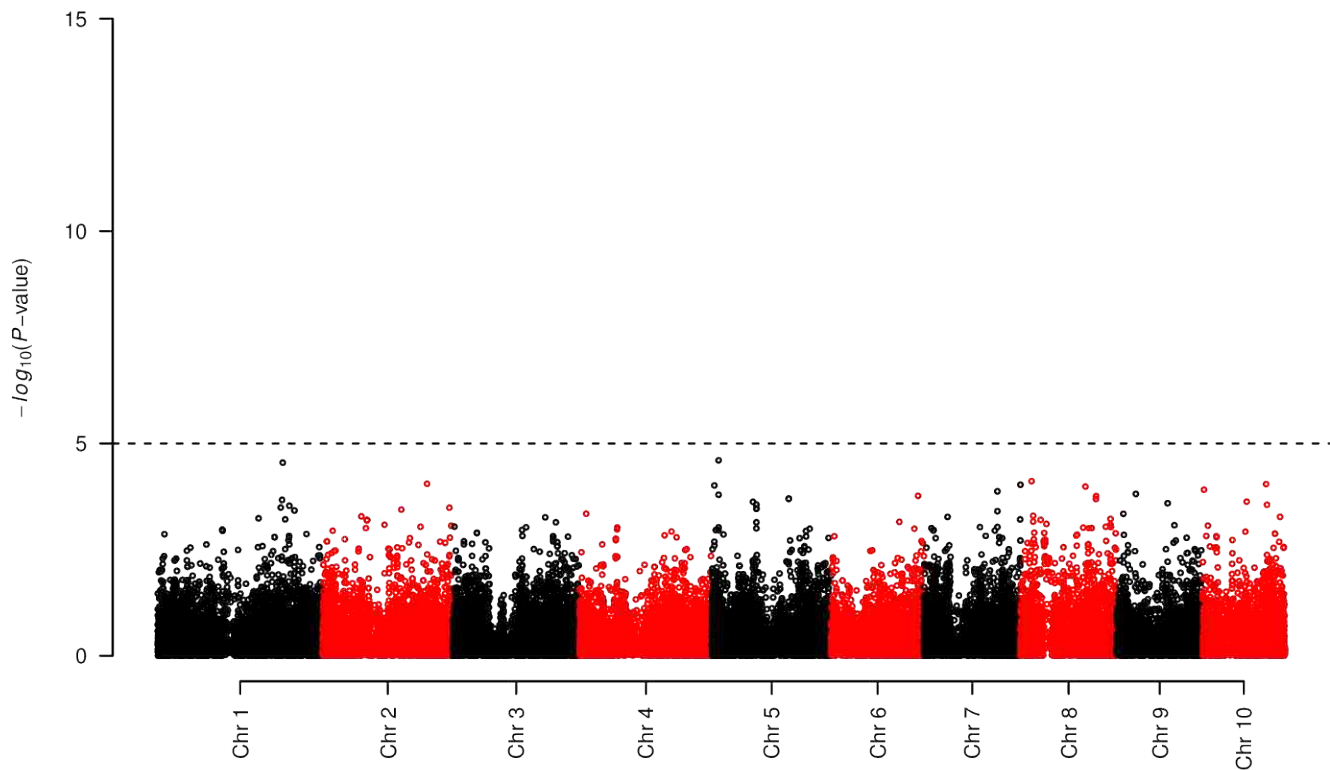

# LFNBb

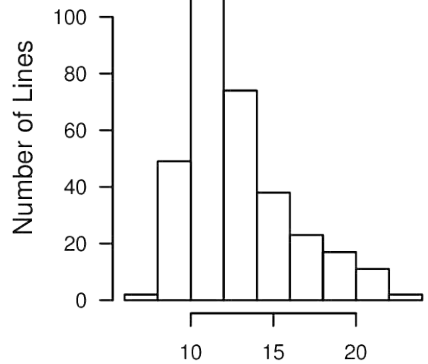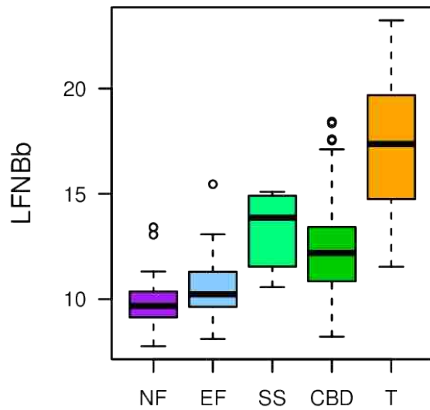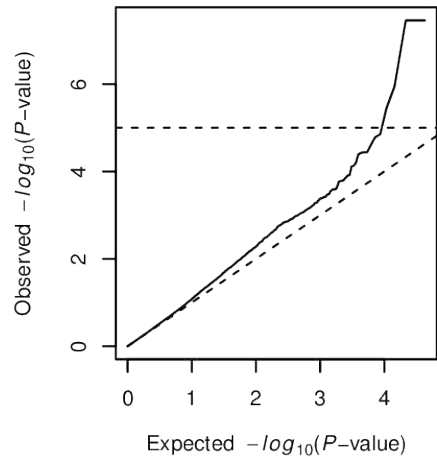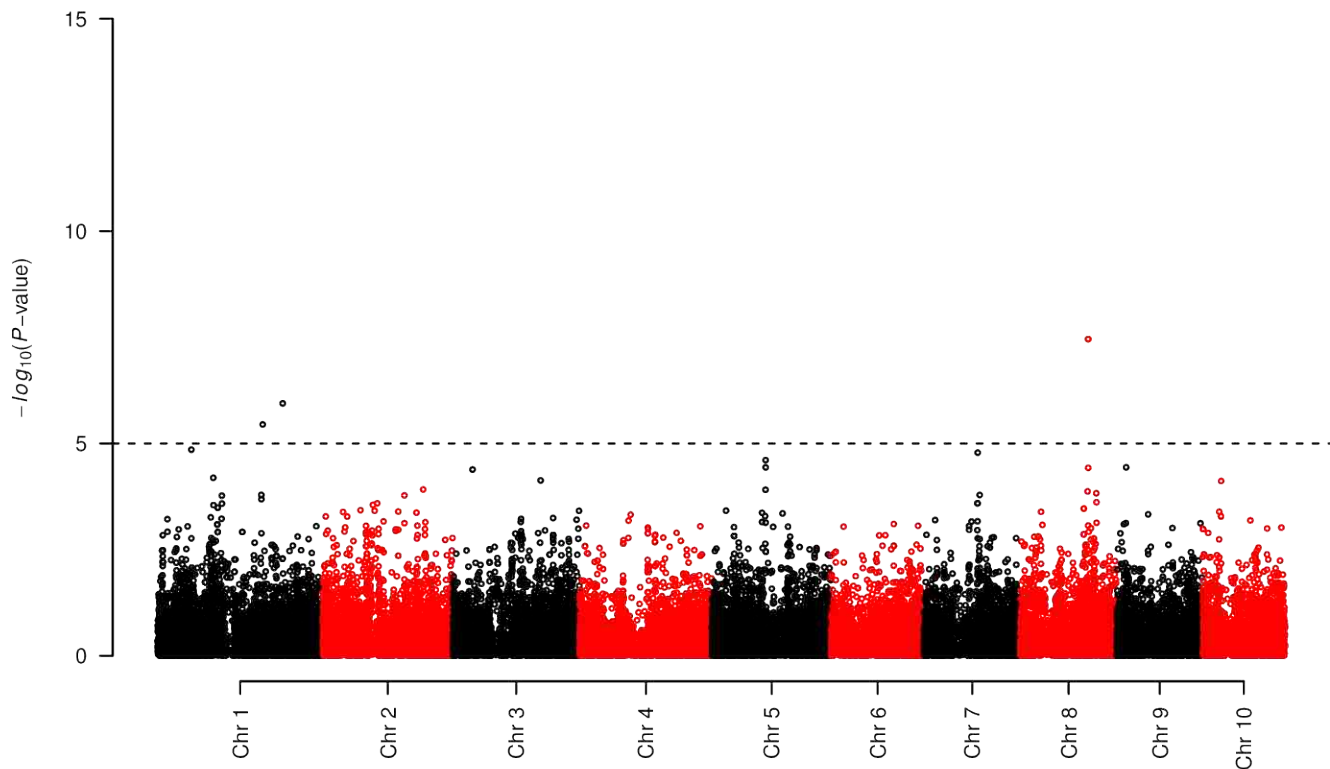

**TINB**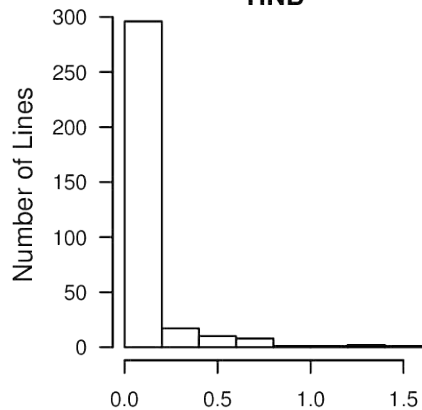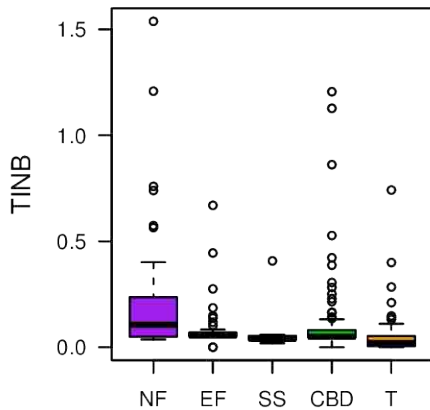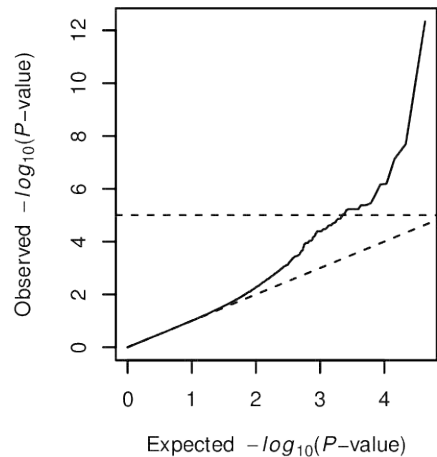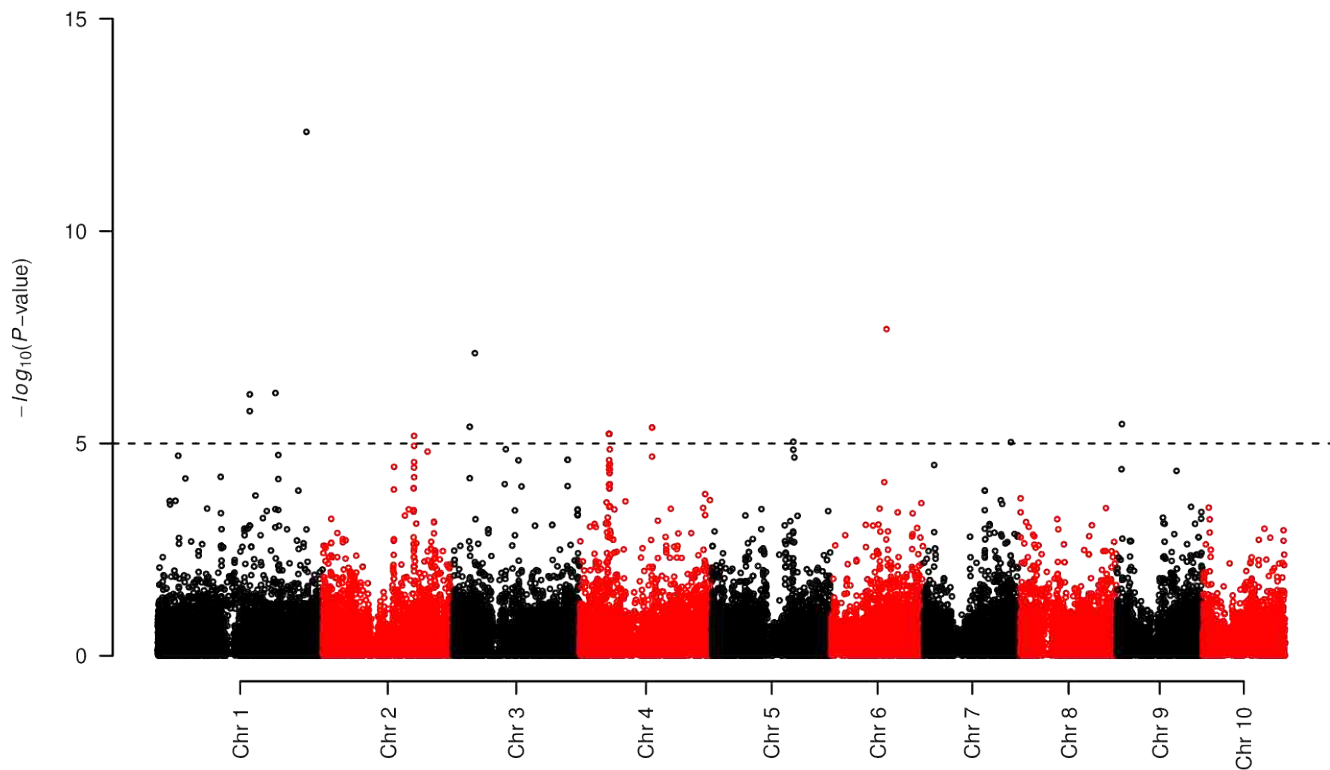

**HL**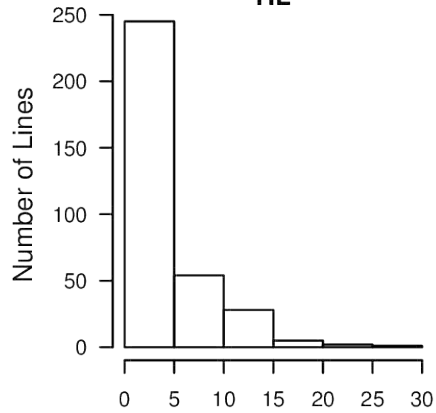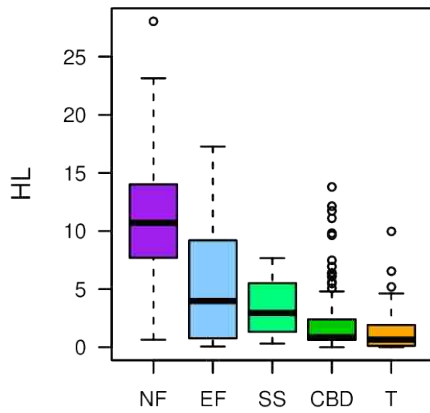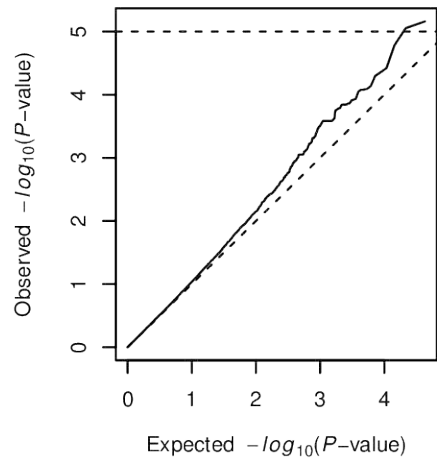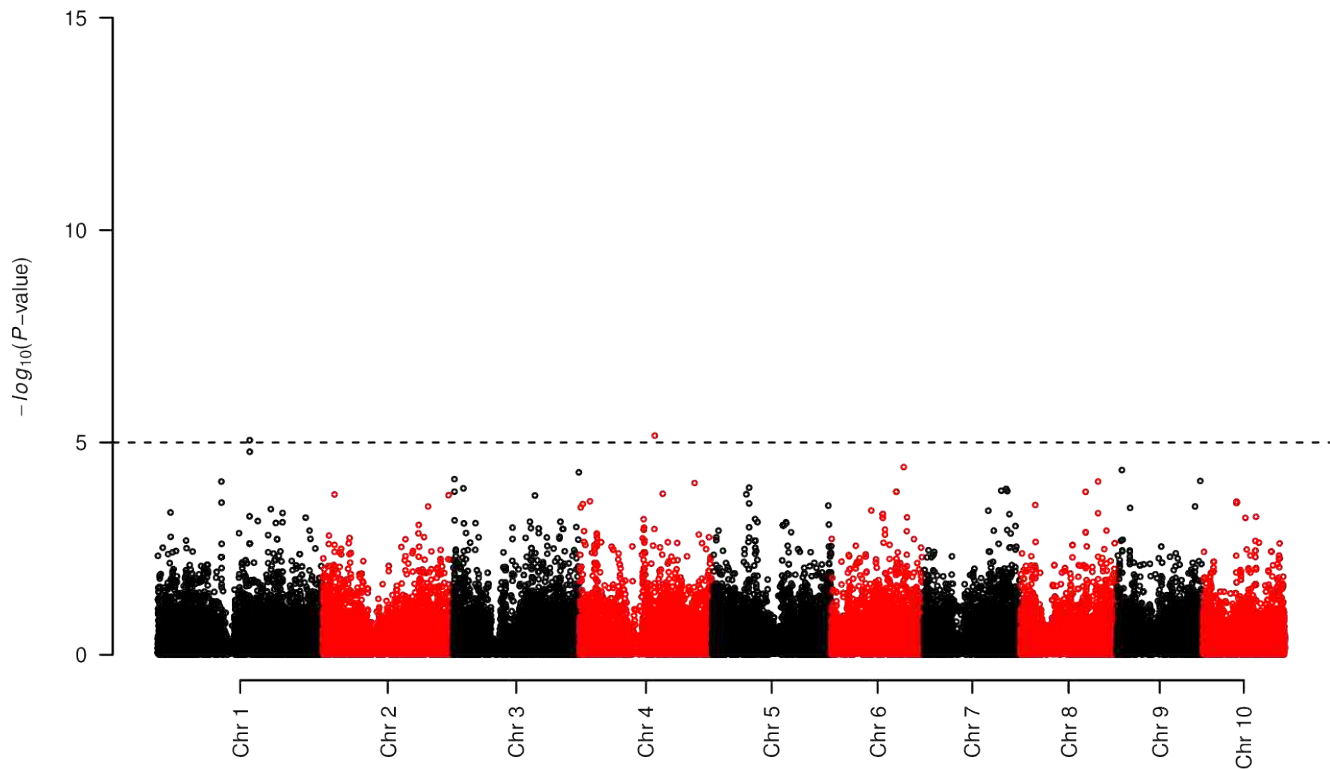

**EARNB**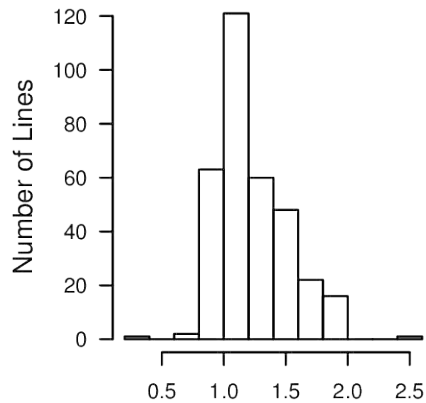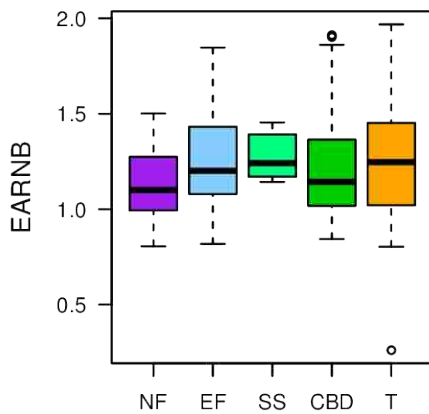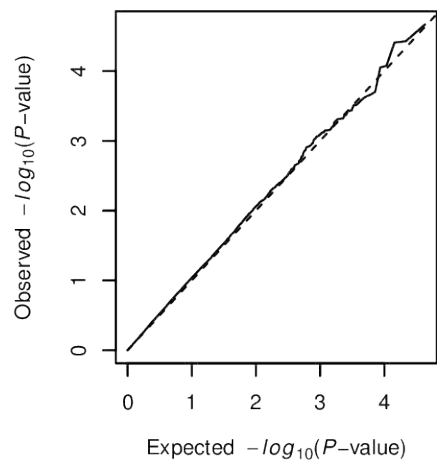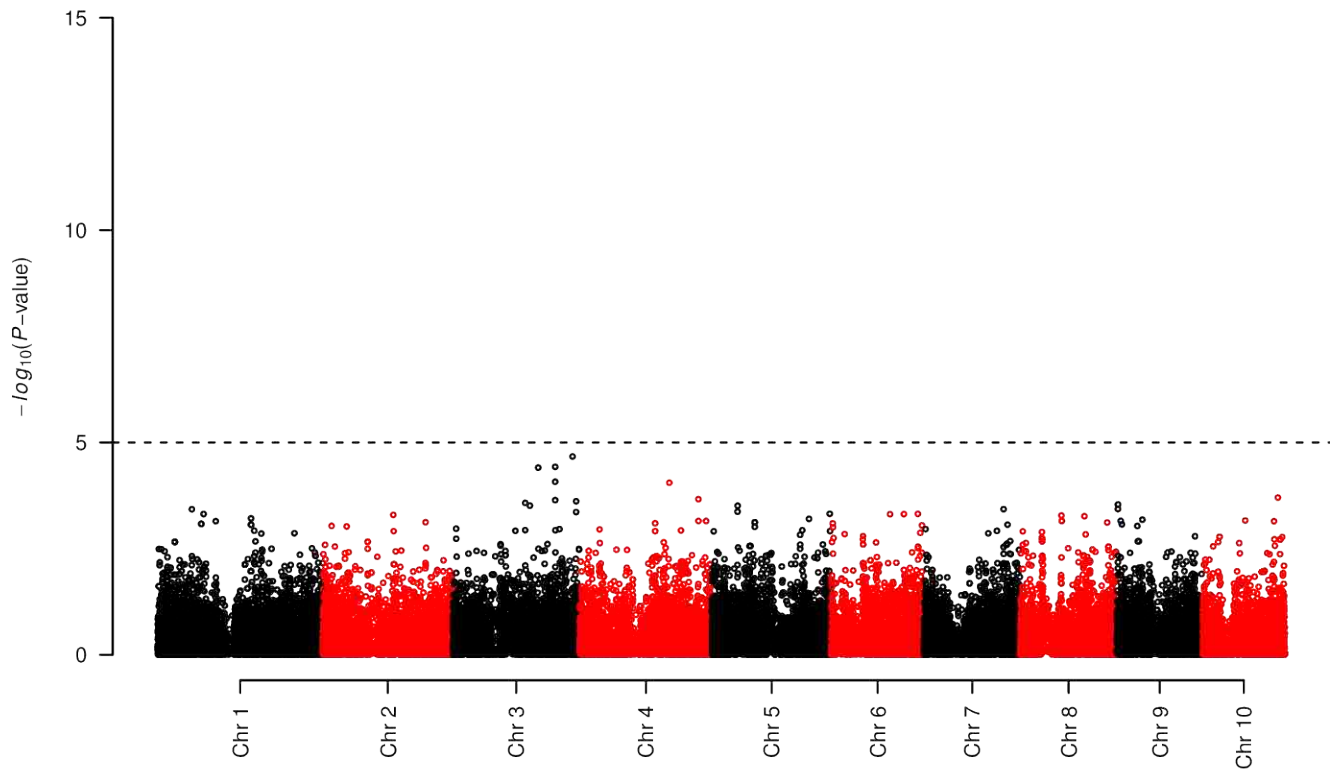

**ROWNB**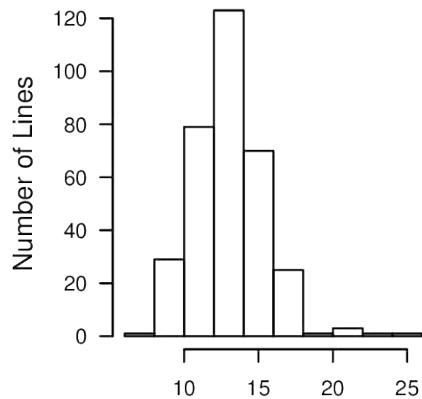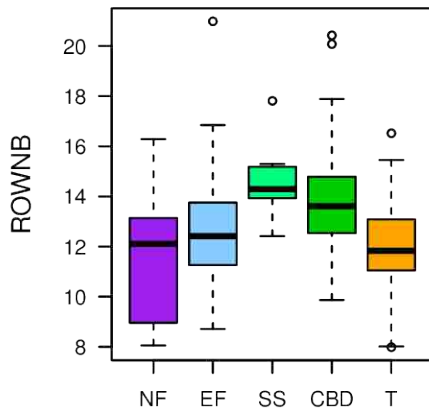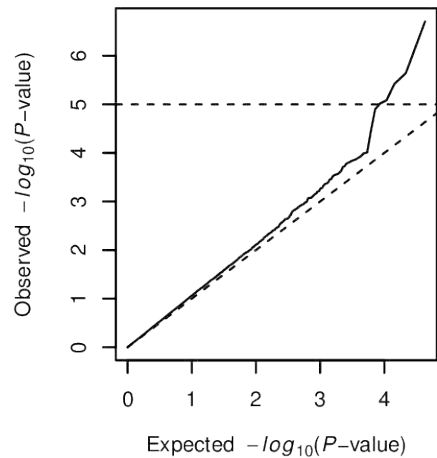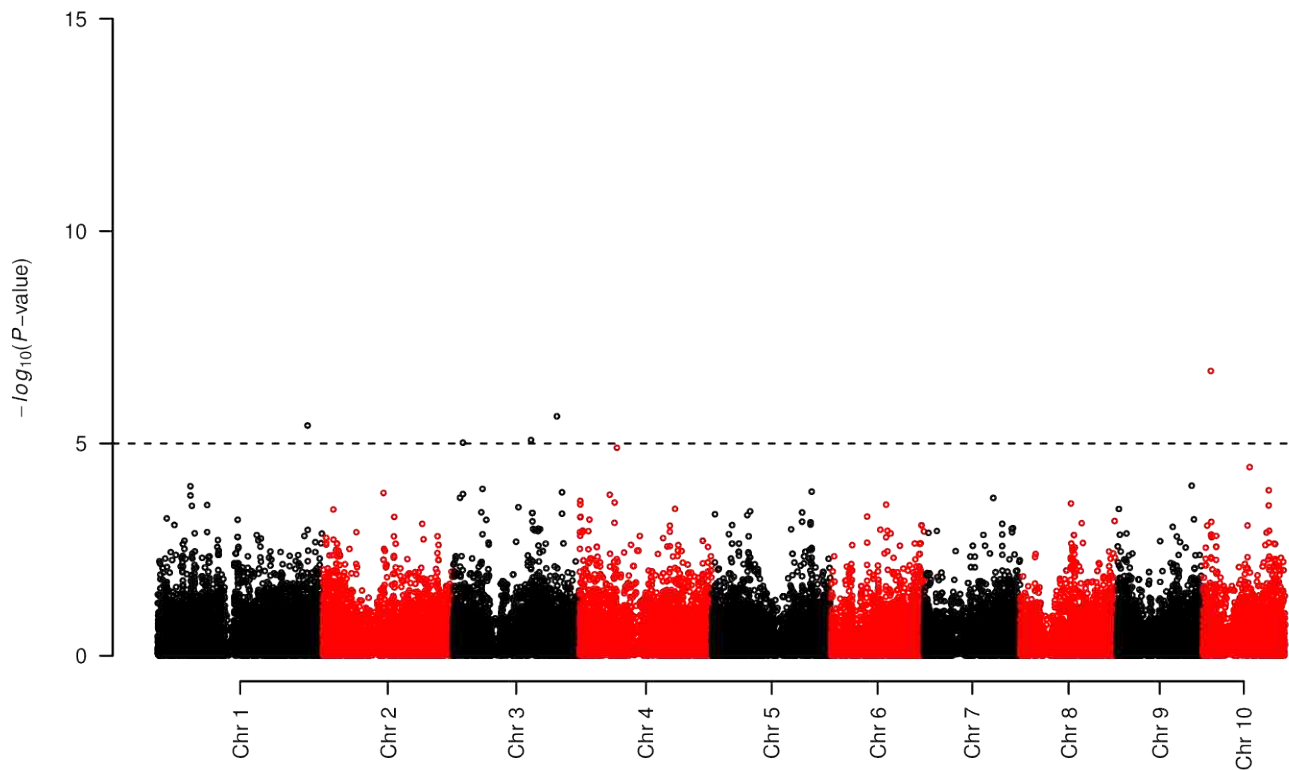

### KERROWNB

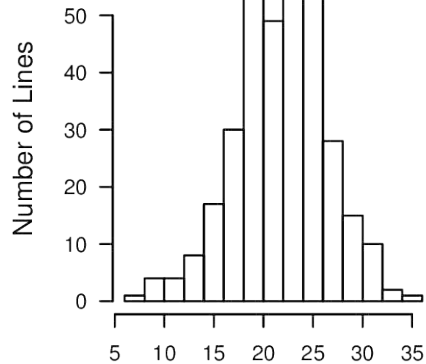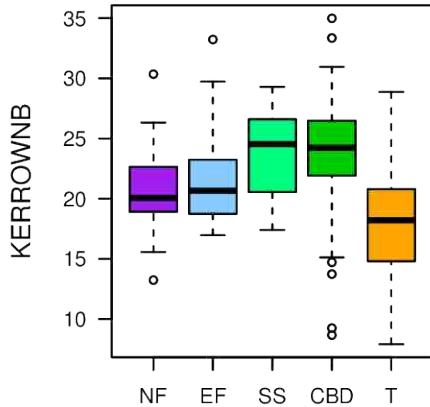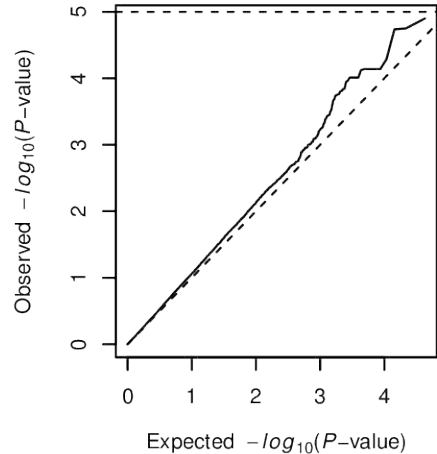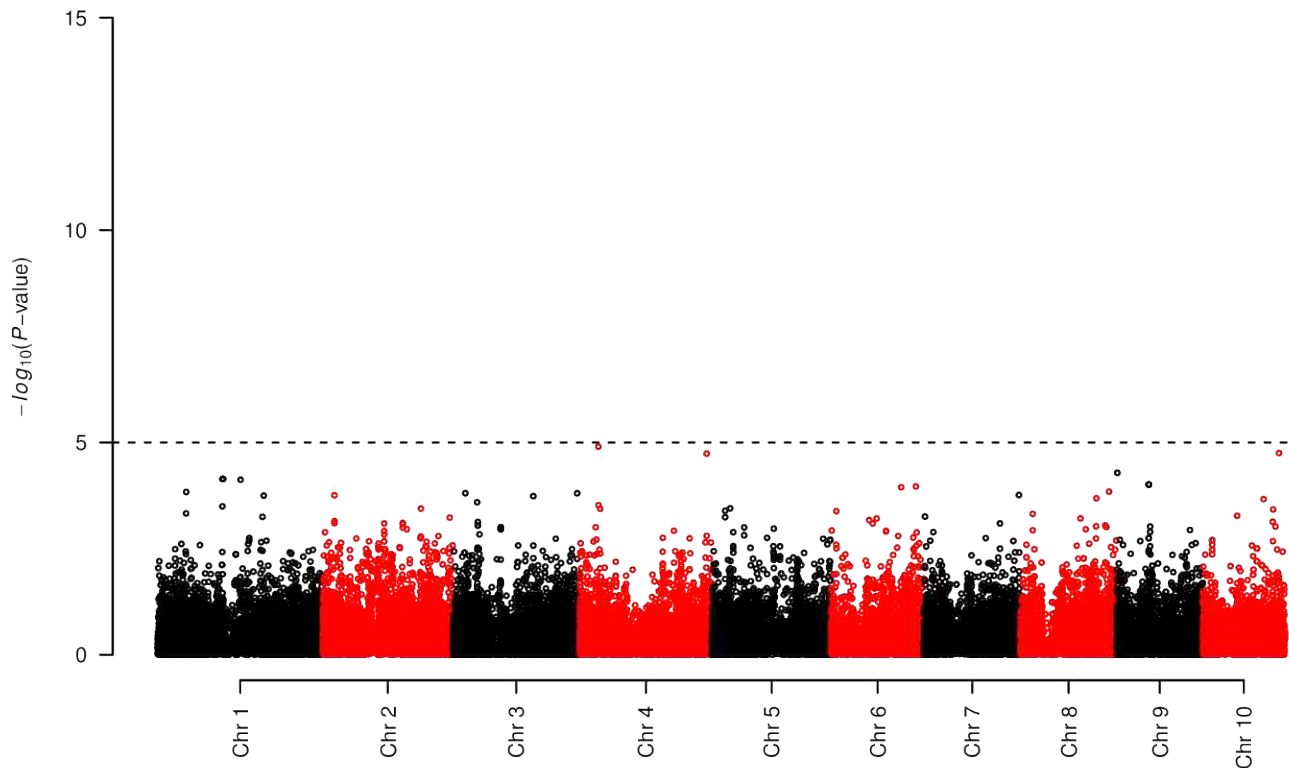



**TKW**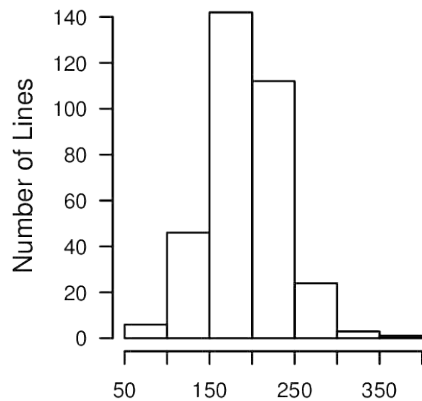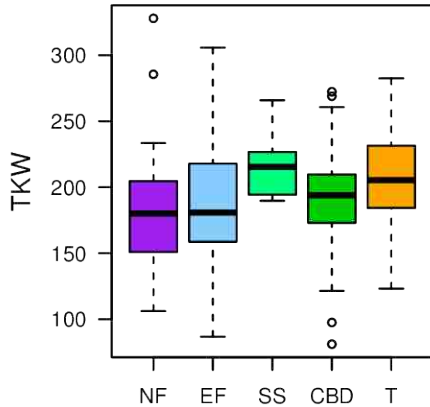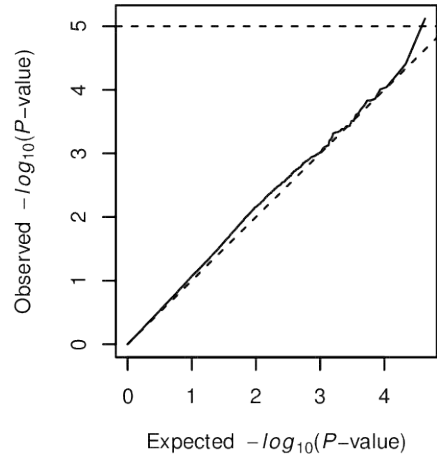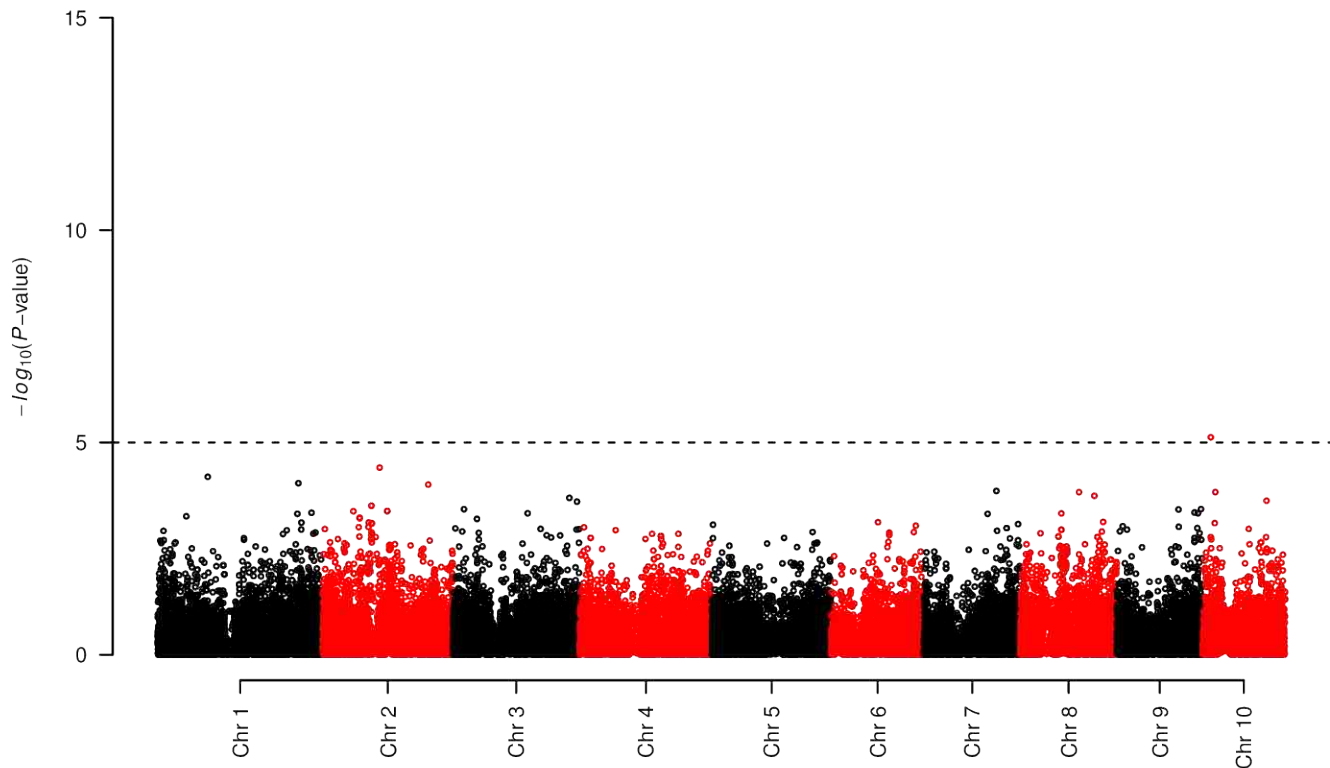

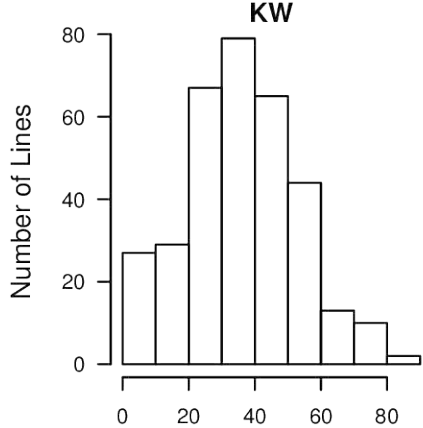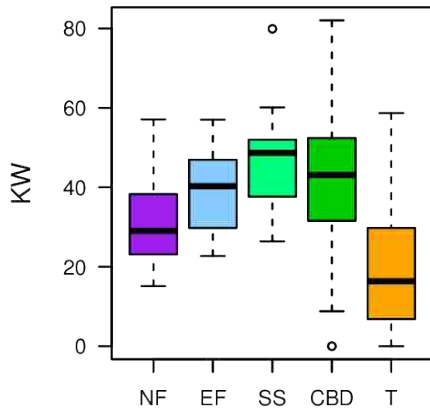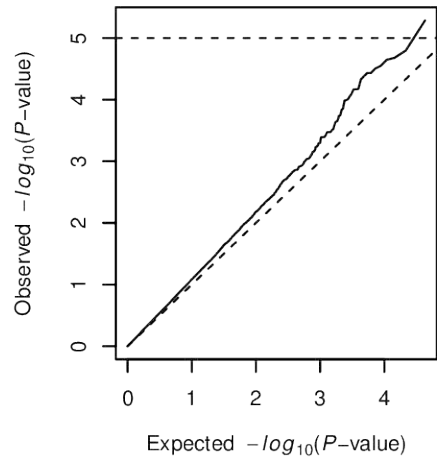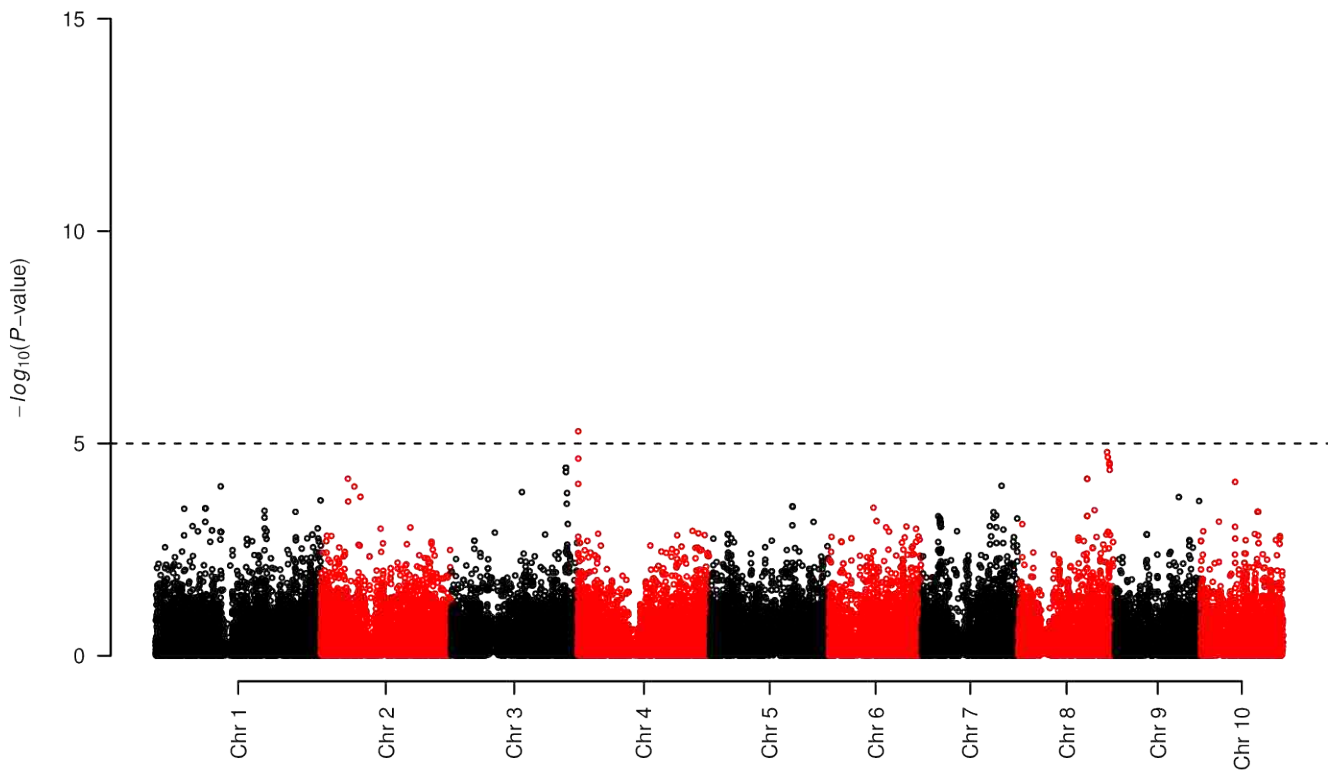

### PnSt

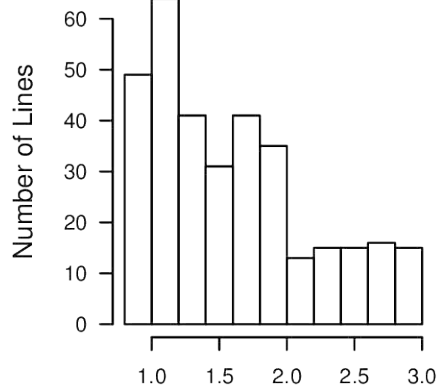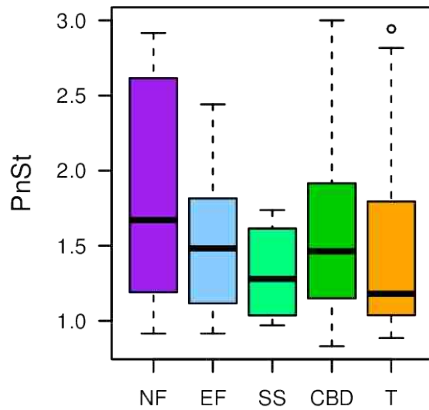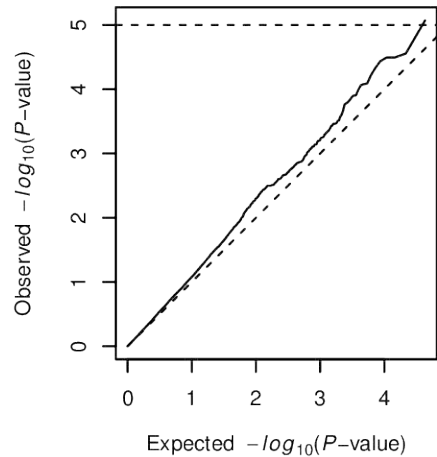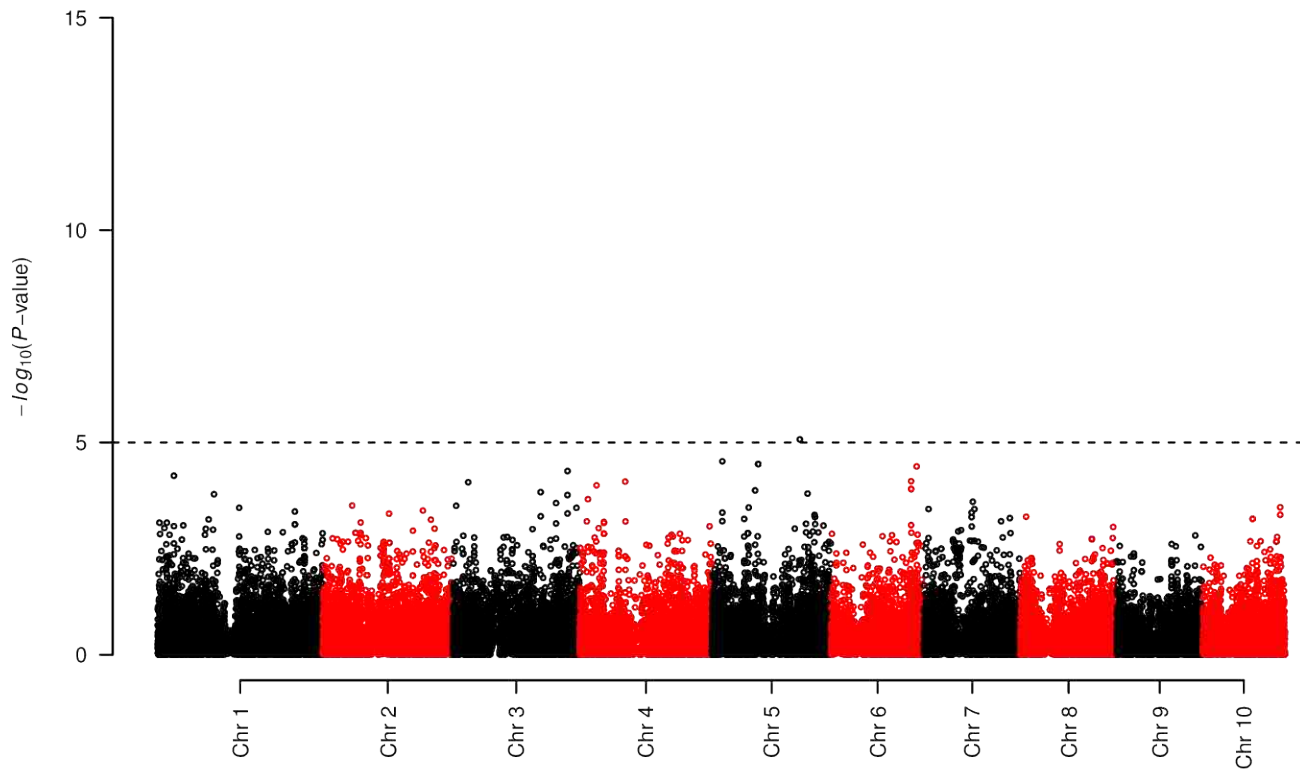

**PnAk**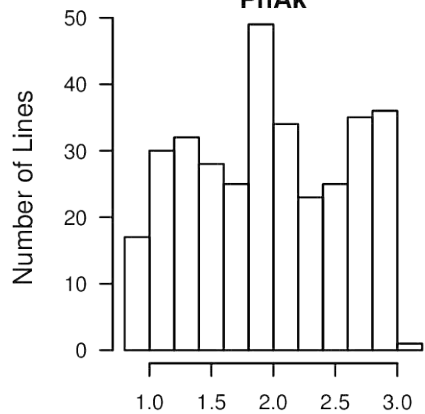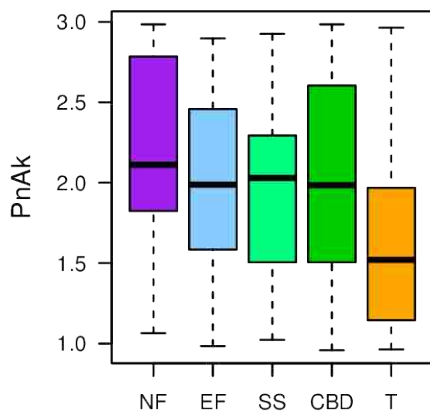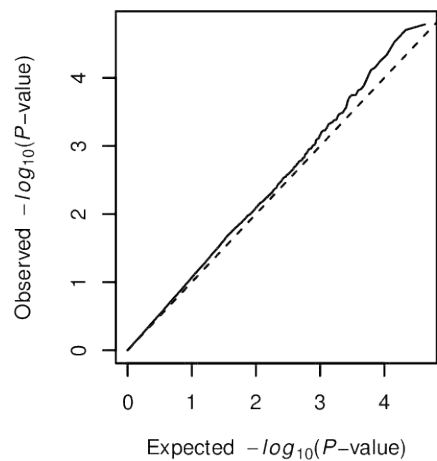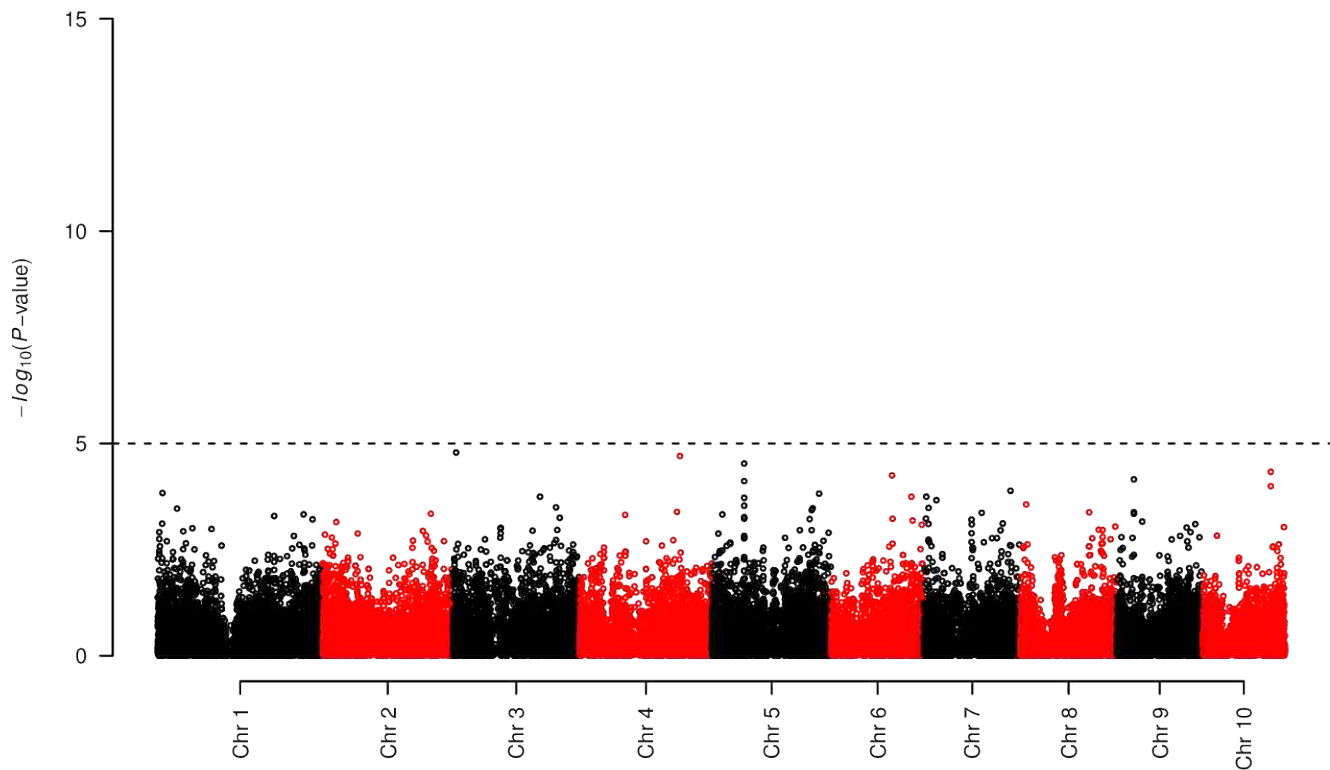

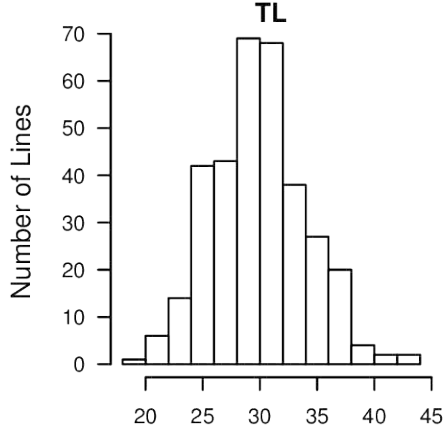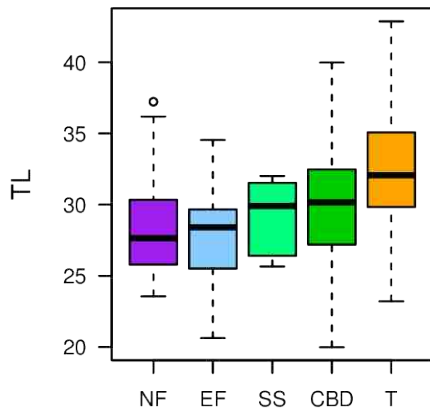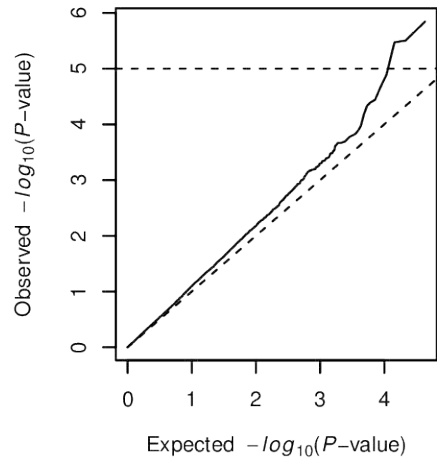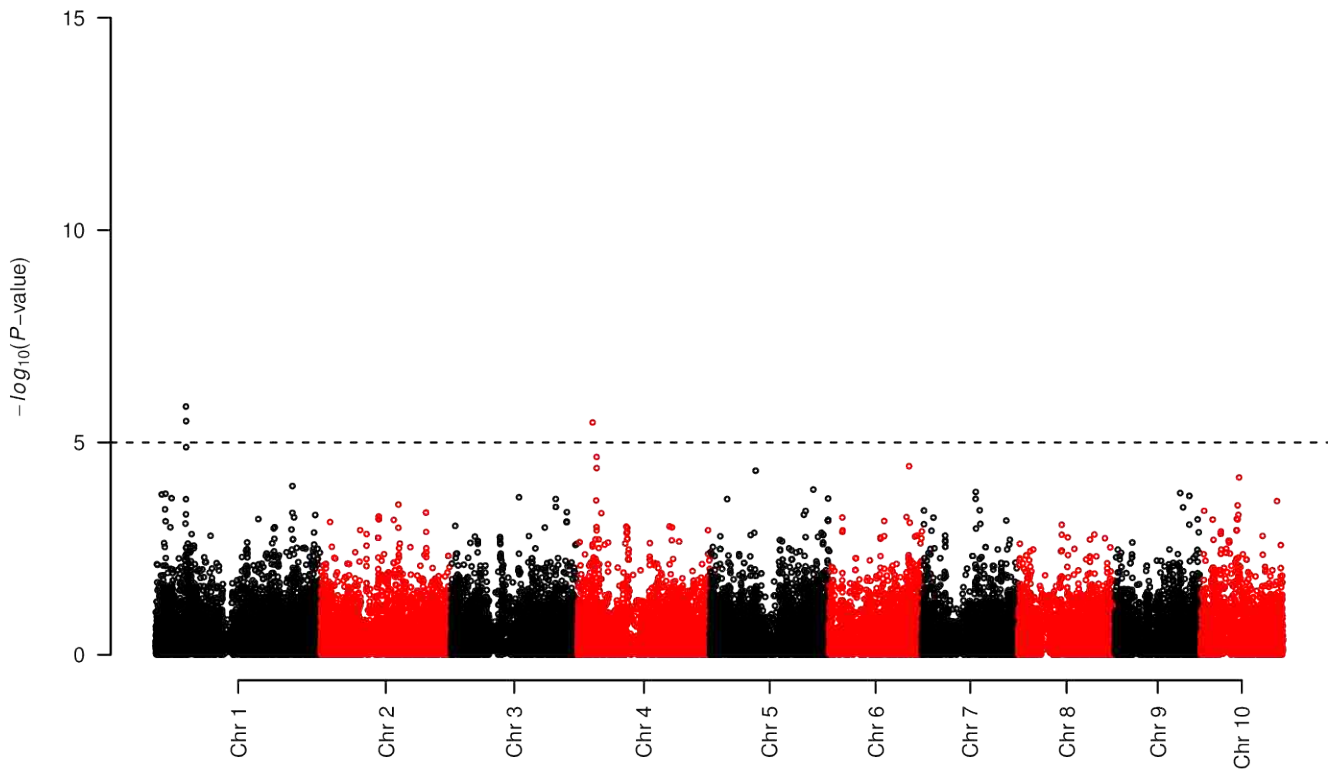

**SL**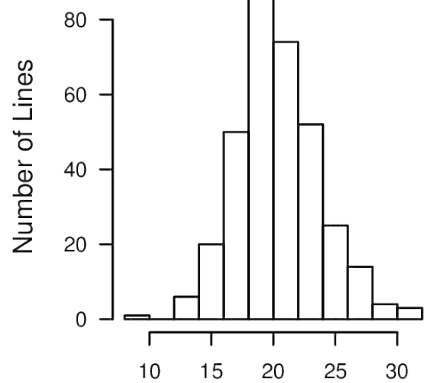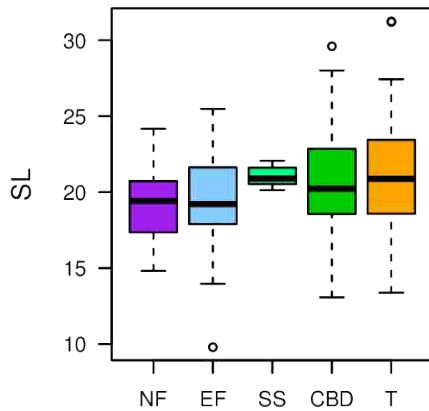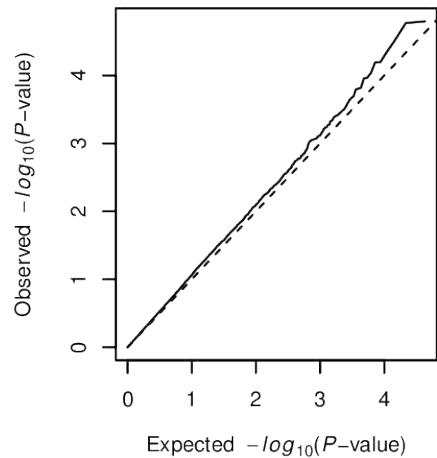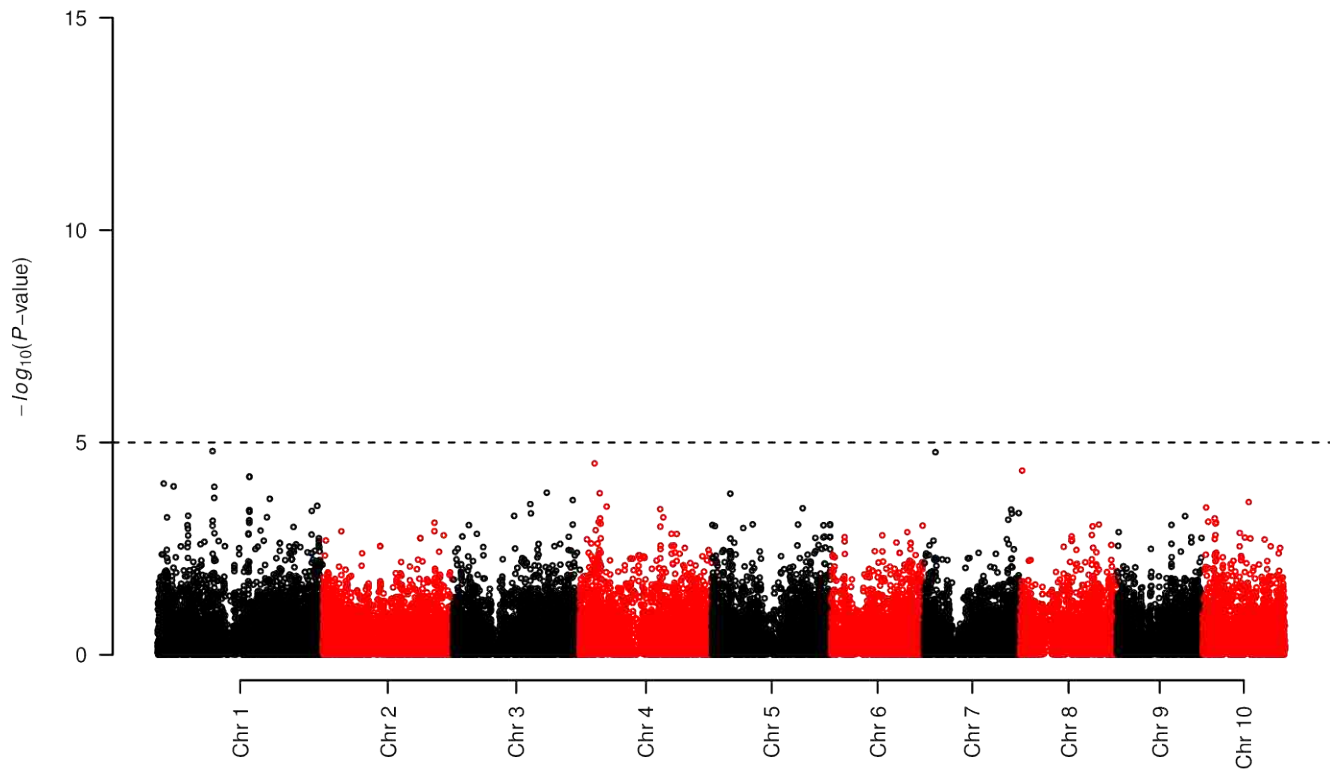

**BZL**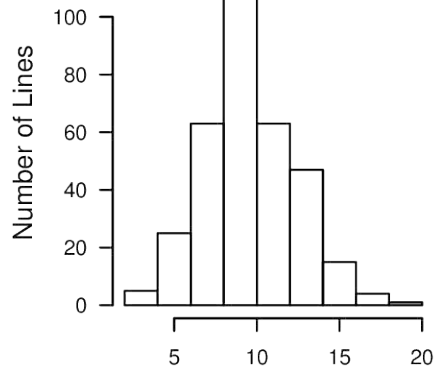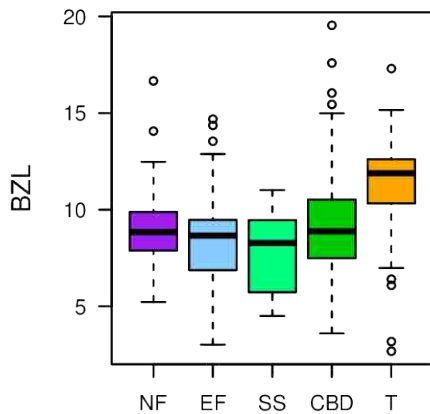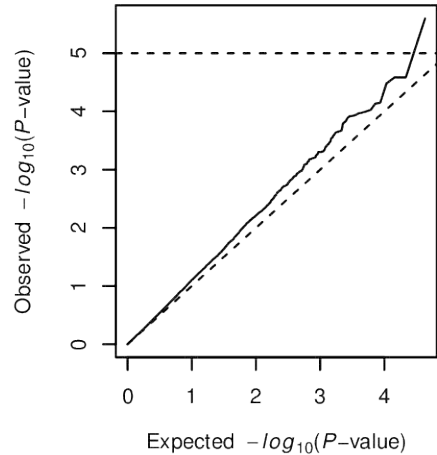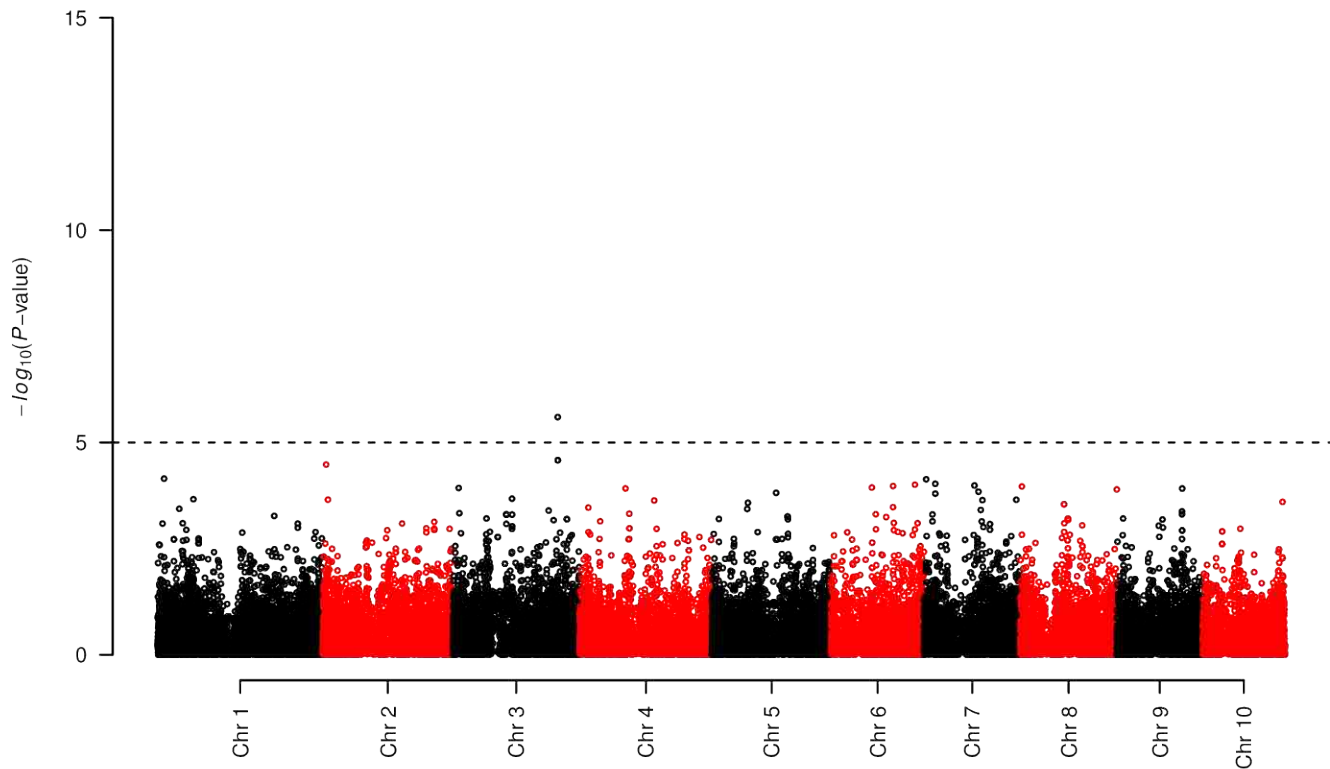

**BRNB**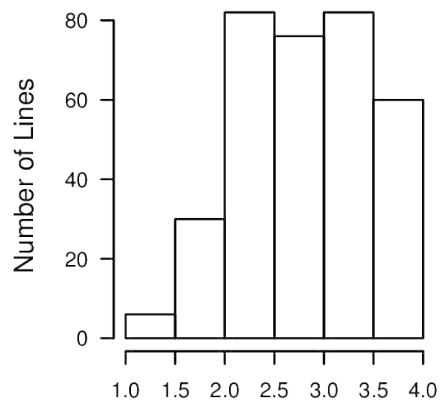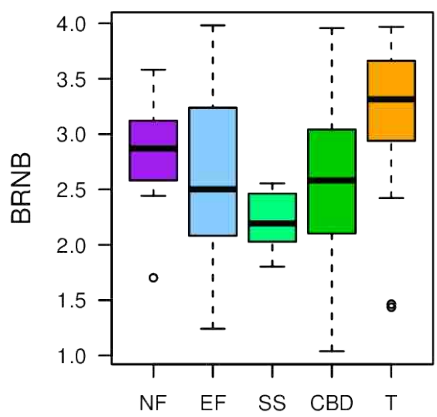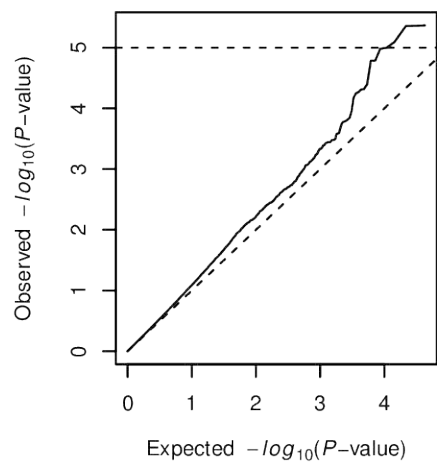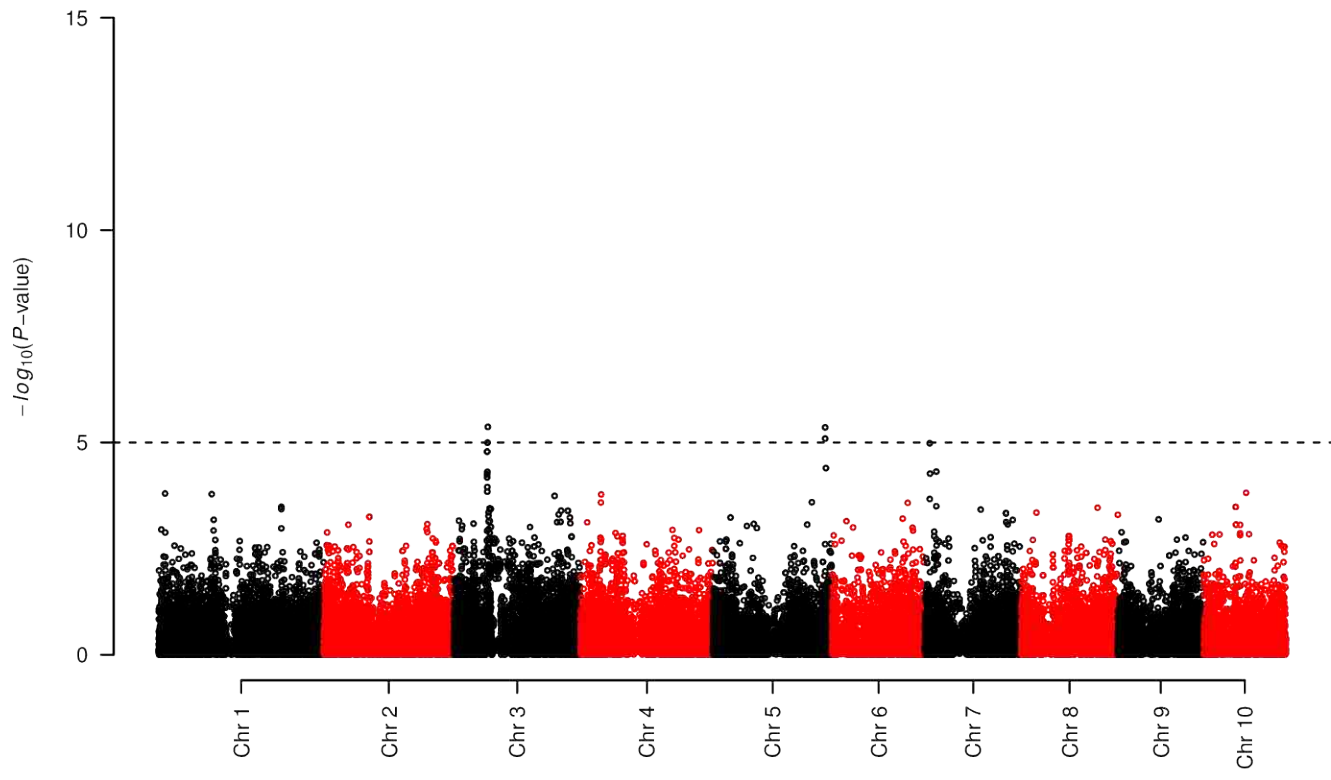

Supplement: hdy201688x3.pdf [file hdy201688x3.pdf]
