# Supplementary material
Source: PubMed Central journal article supplement (PMC5315527)

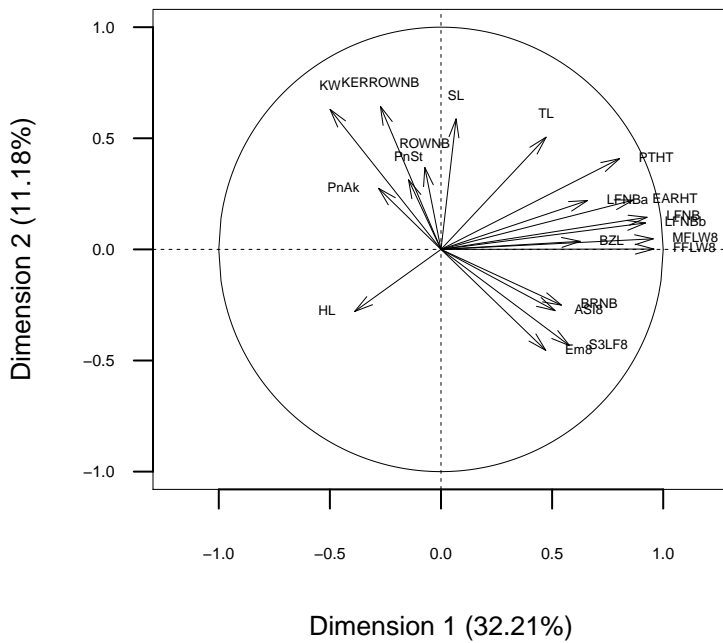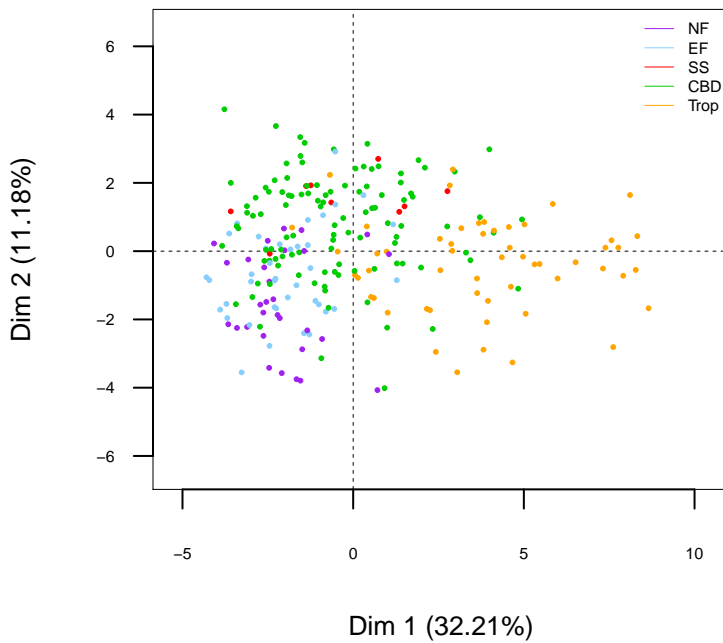

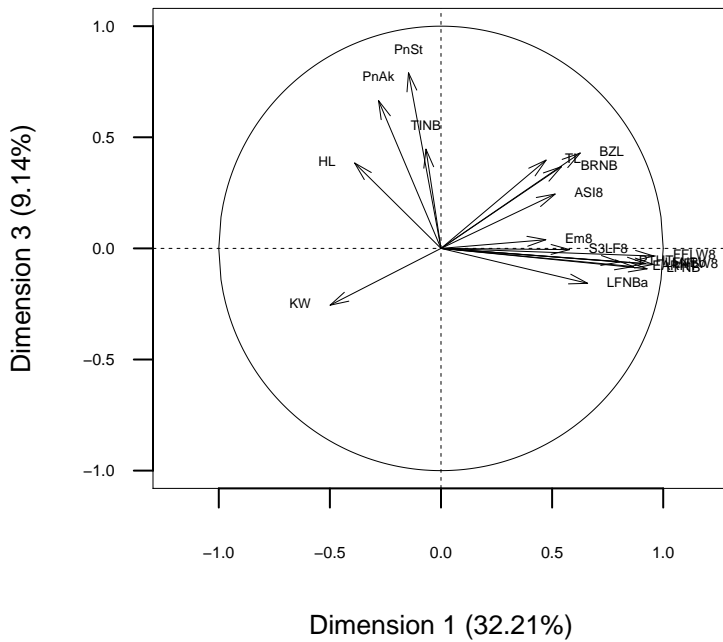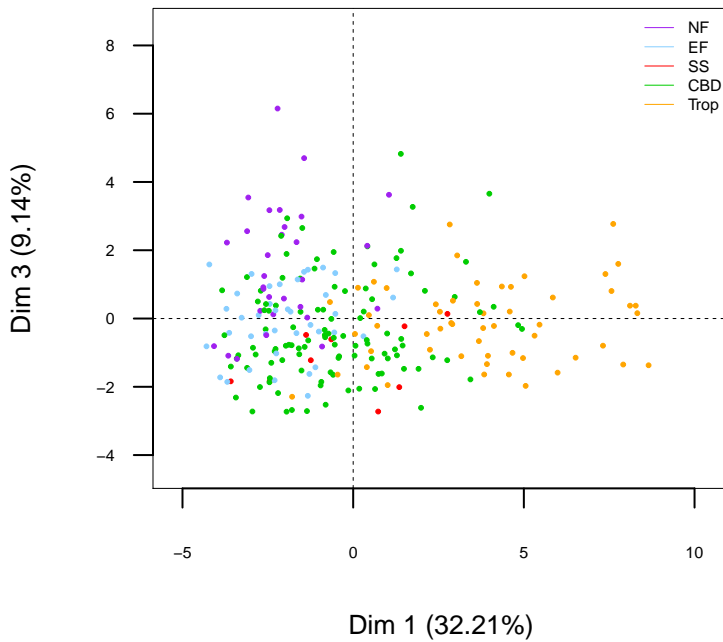

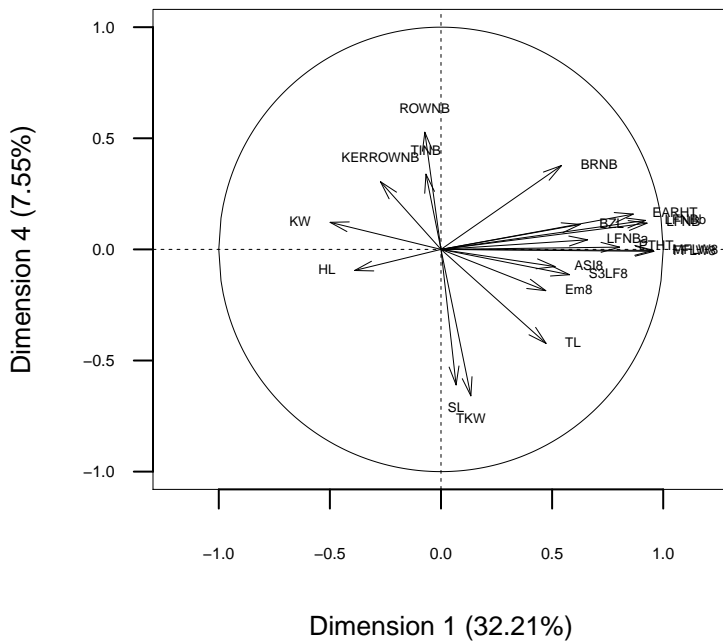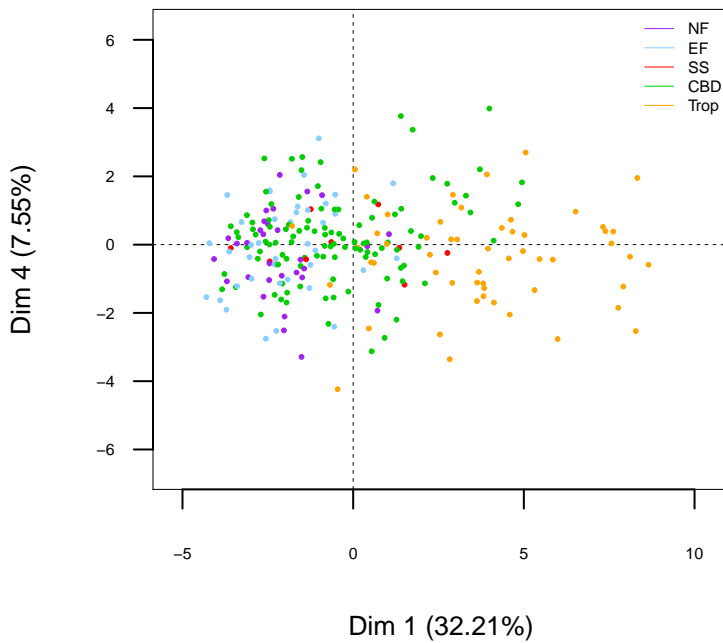

Supplement: hdy201688x1.pdf [file hdy201688x1.pdf]
